# Supplementary material for: Expanding the CRISPR/Cas genome-editing scope in Xenopus tropicalis
Source: Cell Biosci. 2022 Jul 8;12:104. doi: 10.1186/s13578-022-00841-3 (PMC9264700; doi:10.1186/s13578-022-00841-3)
Supplement: Supplementary file 2 — Additional file 2: Table S1. Computationally identified total number of potential off-target sites in Xenopus tropicalis genome with up to 5 mismatches to 7 targets. Table S2. 23 potential off-target sites selected for T7EI assay and the corresponding PCR primers for T7EI assay. Table S3. Sequences of all Cas9s tested in this study. Table S4. List of gRNA targeting sequences for various SpCas9 variants, PCR primers for the amplification of gRNA transcription templates, and PCR primers for detecting the targeted loci. Table S5. List of SaCas9 and KKH SaCas9 gRNA targeting sequences, PCR primers for the amplification of gRNA transcription templates, and PCR primers for detecting the targeted loci. Table S6. List of LbCas12a crRNA targeting sequences, T7 primer and single-stranded oligodeoxynucleotides used for the generation of crRNA transcription templates, and PCR primers for detecting the targeted loci. [file 13578_2022_841_MOESM2_ESM.xlsx]

## Sheet: Table S1
	Table S1. Computationally identified total number of potential off-target sites in Xenopus tropicalis genome with up to 5 mismatches to 7 targets.
	target	Number of mismatch
		1	2	3	4	5
	KKH-tyr-T2	0	0	1	34	383
	KKH-tbx5-T2	1	0	9	98	885
	Sa-tyr-T2	0	0	0	8	60
	Sa-tbx5-T1	0	0	0	6	48
	Lb-tyr-T1	0	0	0	1	7
	Lb-tyr-T4	0	0	0	0	16
	Lb-ptf1a/p48	0	0	0	1	93

## Sheet: Table S2
Table S2. 23 potential off-target sites selected for T7EI assay and the corresponding PCR primers for T7EI assay.
Off-target	DNA	Chromosome	Position	Direction	Mismatches	target -1000 bp to +1000bp	PCR primer F	PCR primer R	length (bp)
Lb-tyr-T1-OT1	TTTAtAGGGGCCAGTTaCCAAGtGCAg	Chr05	50354708	+	4	AGCAGCTATCTGGTTGCTAGGGTCCAATTTAACTAAGAAACCATGCAGTGGTTTGAAAGAGAGGGGAATATATGACAAGAGAAGGGCCTAGATAGAAAAATAATGCAACATAATAATAACAATAAATTGTAGCCACAGAGGAATATTTTCCGTGGCTACTGGGGCTAATTTGGCTCAGTGACCCCCATTTGAAAACTGTAAAGAATCAGAAGAGGAAGGCAAATAGTTCAAAAACTTTAGAAAATAAAAAAGGAAGACCAATTAAAACTTGCTAAGAATAGGCTATTCTATGACATACTAAAATTTAACCTGAAGGTGAACCACCCGTTTAAGCTATTGGTTGTGGCCTAAAAATTAACACTTGTTGTTTAAATTAGGTTACCTGTAATTTTCTTTTGT…	CAGAACATGATTTCTAGAGCGGGA	GTATCAGGCAGTTTTGGGACTTTAG	529
Lb-ptf1a/p48-OT1	TTTATTGGGCTGATGGggGCTGTCcGa	Chr10	3730255	+	4	ACAAATAGCCCCCCAGCCTAATAAATAGTGACTGTCTGTGGCACCTTACAGCCCCCCTGGCATTCCCAGTACCCAGAGGCACAAACAGCCCCCCCAGCCCAATAAATAGTGACTGTCTGTGGCACCTTACAGCCCCCCTGGCATTCCCAGTACCCAGAGGCACAAATAGCCCCCCAGCAGCCCAATAAATAGTGACTGTCTATGGCACCTTACAGCCCCCCTGGCATTTGGCAGAACCCAACAGATCCCATACCTGTACCCAATCTAAATAAACAGACATCTTCCTTTCCCTGGCACGCTAATAAGCAGCCGGGGTACATACCCGTACGGTAGATGTACTGCAGAATGCAAAGAAAAGAGCAAATATTAAGCAAATGCAAATATACTTCCCTGGTGCCT…	CTTACGGGCAACATCTATGGATAAA	GTAGGTGGGCATGTCACAAGAAG	508
Sa-tyr-T2-OT1	ATGcaAAAAcTCTCATCTCCaTAGAAT	Chr01	96551547	-	4	GGTCTTCCAGCAAGACAATGACCCCAAACATATGTCAAAAAGCACCCAGAAATGGATGGTAACAAAGCGCTGGAGAGTTCTGAAGTGGCCAGCAATGAGTCCAGATCTAAATCCCATTGAACATCTGTGGAGAGATCTTAAAATTGTTGTTGGGAAAATGCGCCCTTCCAATAAGAGAGACCTGAAGCAGTTTGCAAAGGAAGAGTGATCCAAAATTCCCAGTGAGAGGTGTAAGAAGCTTATTGGTGGTTATAGGAAGCGACCGATTTCAGTTATTTTTTCCAAAGGGTGTGCAACCAAATTTTAAGTTAAGGGGGCCAATAATTTTGTCCAGCCCATTTTTGGAGTTTTGTGTGACATTATGTCCAATTTGCTTTTTTTCCTCCCTTTTTTGTTCTG…	CTGTGTAAAACGCAGCCATTCCT	TTCTTGGTCTGTCTCCTTTCTCTTT	328
Sa-tyr-T2-OT2	ATGtgAAAATTCTCATgTgCTCAGAAT	Chr02	42213369	-	4	CGCTCTGCGTAAAATATCGCACGCTGCGTAATATGTTGTGCGCTGCGTAATATATTGCTTGAAAATATGTCATCGTAAGATAAATAATGCCAAGAACATCGCTTCTTAATTATGACAAGTGTCCTTTTAGTGAATCGAGTGAAAAATAAGAAGTGATAAGATTTTTAACGCATGCTATAAATAGCACTCCTTATTTCGGACTTTAGTGAATCGGGCCCAATATGTGCTTCCCCTACATCACTGCTCATGTGCATGTCCTGTACCGTGATATCAGAAGAAGGCACATAGCTGTATGTCCAAGGTGCTTGGATAGTGTCTCTAATTCTATCAGGGCTATAGTAATAGAAACAATAGTGTAACCAAATCTTTTAGAAATGATCATTAATATTGTCTCTAGTG…	GAACTGTTTCTGTACATTGTATTGGAA	TACTGTATATTGAATCATTTGACATTC	359
Sa-tyr-T2-OT3	ATGtTActATTCTCtTCTCCTTGGGAT	Chr02	87573486	+	4	CCCCCCTCTGTGTGGCCCCCCACCTGTCTGGCTGCTTTGATGGCTTACTCTTGTGTAAGCTTTAAATGGTATCAGTACTGAGATTAACTGCCCCCCCTGCATGGTTCTCACCTCAGATTCAGGCTGTAATCAGGCTGTATTGTTTAAATATGTAATCCCCTGTGTTGTTCACACCTTTTAATCTCTGCATTGTTCACCCCCTGCAGTGTTCACACCTCAGGCTCAAGCTGTAATCACCCATATTGTTCCCCTGTACACACCTCAGGAGCAGTAGAAACCCACAAATAATCCCTGCATACTACAAAAAGAACATATACTGAGGTGGTACTGCAATTAAAAAGTTTTTTAATATATAGTTATTGTGCAGACTGTAGGAGCAGTGCCAGCATTGTGTCACTG…	AGGAGTGGTCAAAACTGGCTTCC	GGTGATGCACCTATCTGGGCTA	522
Sa-tyr-T2-OT4	ATGGgAAAATaaTCATCTgCTCGGAAT	Chr04	101541430	-	4	ATGTGAAGCCTGCTTCACTTCTACTACCACAGCATTTTTAATCCAAGCTAACAAGTCTTTGGAACATGAATCCTCTTTAGCTGAATCCTCCGGTTCAGGATCAACAGAAACAAATGCACTTCTAGAAGGTTTAAATGATTGAGCAGCTAGGGCCAGAAATTGAAGAATATCATTTTTTTATCTTTAAACTCTTATGTGAGGCACATAAGTAGAAGGCGGGGTTATGTTGATAGGTTTCCTTCTGTTATCGCTGGTGCTGAGAGAGGGACTACCCAAATATTAAGGTGCTATGGAGGGGAAATGTCAATACTTGCATTCAAAAACTGTTTGTTAGACTAAACTCAGAAAATTTAACCAAAAACTAATTTCTGATTTCAAGAAGTTTTAAATGGGGCTGGT…	TGGAGCAAAGAAGCATGTTCATTAC	CTGTCACTCACACATTTCTGCGTCA	355
Sa-tyr-T2-OT5	cTGGagAAATTCTtATCTCCTGTGAGT	Chr05	99198903	-	4	GCACCTGTTTGCTCTGGGGTATGTAACCCTTTCCTGCATCAAGGTGCTGCACGGCTGGAAGGGGGCGATAGCAAATATAGCTCCTGATAAGGGCAGTATTATGGGCTTCCTTTATAAGGCGTCTGTCTCACAATCATAGGATTGCAGCCCTCTAGCTGTTGCTTTACTGCACGTTGGCACATCTATAGGCCCCCCTAGTCTTCCTGCACTTCCACTACTTTTACTCAAACCTGGGAAAACATTGGGGAGAACATTCTTTTCAATTTTCTATCCTGCTTTTGCTTATATATATGATTGTGAAAGTCTTTAGGTTTGTGTATACGTAGTTTCAGGTGGTGAAATGAGTATCTGTATTTATATGTTTGAAATGATTCACATATGTAACCTCAGGGATTGCTT…	GGTCAGCACATGATGGCTACTAG	ATACTCTTGGTCTTTAGCATTCTGA	446
Sa-tyr-T2-OT6	AgGGTAAAgTTtTCATCTtCTAAGAGT	scaffold_1599	11155	+	4	TGATGGAGACAAGGAGGAGGAAGCTCAGGCTCCGGTTGTTGGCTCTCACAATGGGGGAGTCCCGGTTTATAATGAAAACTCCTAATATCATCACTGTTATAACAAAGAAGAAAACTGAGATTGATGAAAAAATCACAGAAATCACATCATTTGTGTATGAGAGAAATACTTCTGTTTTTGCAATGCAGATAGTCCTCTTCTTATTGGGCCATTCCATGTCCGGGCAGCTGATACAGTTCTCACTGTCTGTGAGAGTGACAATAATGAGAAAGTAAAAAAGAAATTATGCACTTTAACACATAGAGGAACACTAAACCCAACTGTAAAGCTGTCCCACTGCACCCCCTAGCCCCAGGAAGTTGATGAAAAATATAATTACACATGGAAAATTATTTAGTG…	ATCAGAGTTTCCTACGACTTCAGGT	ATCAGAGTTTCCTACGACTTCAGGT	334
Sa-tbx5-T1-OT1	TCCAcTGgGCcCCTtTGGCTGGAGAAT	Chr01	146179977	-	4	GTGAATGTTTTAGGTGAATGTCAAATGAAAGGCGCGTCATGCTACATGATTCCAGTCAGCCGTGTGCACAATTTGTTATTTACAAACACACCGGCAGATCAAGTTTTTGTGATGTTAGCGCAATTTCATAATGAGGCAGTAATGCCGCACGCCTGCCTGCAGAACTGTTACAGAATTTGGATTTCTTTTTTTACATTCAATTAAAAGTGCATTGGTTTATTGCAGTATTCGTAGAATAAGAAAATGGTGATGGATGTTTAGTTTTTAGGGCAACGTGATCAGCTAGAACTGTAATCTAAATGCTGTCACTTAAGGGCTAGTGGCTGCAGATCTGGCTAGGAAATGACATTACTGATTGTAGCAGATCTCTTAACGTCAACAAGTCTGTACTTTCAGCTT…	ATTTATCATATGCAAATCAAAGATAA	TTGTGATTGATAGATGGCAGATGTA	478
Sa-tbx5-T1-OT2	TCtAGgaTGgGCCTGTGGCTGTAGGAT	Chr04	104469949	-	4	AGTACACACAGGATATTGTGGAGCAGACAGAAACTTTAATTGCACACACATAATTCACAACTGGACCAACACCACTGCTTTTAAAGTGAGCTCAGAGGATAATCTGTGTGTAAAACACCTACAAGAAATCAGAGGGAACATTTATTATAGCTATGCATAGGTCTGTTCTCAGCATTAGTAGAGCCAAGGGCAGAAAATGCCTATGTGGAGTTATCTTTTATTTATATAAACAGAGCTACCAAGTCTGAAGCTTTTGTTGAACTACAGCATCCCCCAACAGGCTTGCCTGAAGGCTGTAGGTTGGACAGCCCCCAAAGAAACTGTTACTGACACTATCTTGCCTTACAATACACACTATGACACTACTGCTGCCCTTTCCCAAGAAAGAGACAACATGCA…	AATGTAAGAGAGGACTTTGGACTCC	AAAGATGGGTAAGGTTTCAATCAAA	456
Sa-tbx5-T1-OT3	TgtAGTGaGCtCCTGTGGCTGCAGAAT	Chr04	132101934	+	4	TATTTTGTCGCGCGGCTATTGTTTCGTCGCCTGCGGCTATTATTTTGTCGCGCGGCTATTGTTTCGTCGCCCGCGGCTATTATTTTGTCGTGCAGCTATTGTTTCATCGCCCGTGGCTATTATTTTGTCTCGCGGCTATTGTTTCGTCGCCCGTGGCTATTATTTTGTCTCGCGGCTATTATTTTGTCACGCGGCTATTGTTTGTCGCCCACTGCTATTATTTCGTCGCCCGCGGCTATTATTTTGTCACGCGGCTATTATTTTGTCGCGCGGCTATTGTTTCGTCGCCCGCGGCTATTATTTTGGACGTGCGGCGAATTTTTCCATGGCAAAATTTATCATCCTTTTCGCGAAACAATCCGCCAATGGCGAAATCCATGCCTGGCGAAACTTTTCGCC…	GTGGCCTAGTTGAGATGTAGCAGTA	TCTCCTTAACTGGGGGAAATCTCAG	346
Sa-tbx5-T1-OT4	gtCAGTGTaCGCCTtTGGCTGCTGGAT	Chr07	109242629	+	4	CATCCTTGGACAGCTCTTTGGTCTTTCCCATGTTGGAGAGTTTGGAGTCTGCTTGATTGATTGATTCTGTGGGCAGGTGTCTTTTATACAGGTGACTAGTTAAGACAGGTGTCCTTAATGAGGTTGACTAATTGAGTAGAAGTGTCTAACCACTCTGTGGGAGCCAGAACTCTTAATGGTTGGTAGGGGTTCAAAAACTTATTTCACTCAATGAAATGCAAATCAGTTGCTATCTTTTATTTAAAGTTCTTTTTTCAATTTTCCTTTTTATGTGCTATCTGCCACTGTTAAAATAAACCTACCATTGAAATGATACTGTTCTGAGACTTTTCATTTCTTTGTCATTGGACAAACTTACAAAATCAGTGAGGGGTCAAATAATTATTTCCTCAACTGTAC…	GTGATTACTTCCCTTTCACTGAACA	TGTTGCTGGTCGTTTTATATGATAT	214
Sa-tbx5-T1-OT5	TCCAGTGTGtGCCTGTGtCctCAGAAT	Chr08	94291934	-	4	CGGGGTGTAACTACAGAGGAAGCAGACCCTGTGGTTGCCAAGGAGTGCAGAGGGCCCAGTAACTCCCTAATTAATTAGCAATCTCATTATATCTTGGTAGAATAGGGCAACTTACCAATATTTTTGGCCCCTAAATTGAATCTGCTGTGGGGCCCAGTGACACCTAGTTACGCCACTGCACAAAATACAGCATTTCATTCAGGATTTAAGAGAAATCCTATCATCTTTGGCACACATTTGATATCATGGCTACGATTCTCTTAAATACTGAATGAAATGCTGTATTTTGTTCAGTGGCATAACTAGGTGTCACTGGGCAACCTAAAGTTGAACAACCCCTTTAGTTTTAGCTGATATTCCTTCCATATGGGAGATCCAATTTTTTGTTCTTTATCATGT…	TATTCAGAACAGTGAGCAGTAAGGA	TGCTTGTTGTGAAGAAATCTACAAA	358
KKH-tbx5-T2-OT1	AGAAgTGTGGCTGAAATTTCAAAGGAT	Chr08	50307679	-	1	CCCCCAGTTAAACACAGCCCAGGTAAGGTAACAGACAGGTAACAAAAAGTTAAAAAAATAAAAAATTACAAAATCGGCAGTGCCTGAATTTTCATGTATGAGCAATATAACCCTTAACAAGCTGGCAAAAGTAGAATCTATGGCTCCTCTCCAAGTTTCTCTTTGATTCATGCCACACAGCAAGTTATTGGCAACACAGCTTGGCTCAAACAGATCTCTGTGCAGATTGTCTGCAATTACCCACTATATAAGACACACTAGAAAAGACTTAGGGGGTCATTTCATACCTCTGGCGGCGCAATTGCAAGAGCGCTCCCCTTAGTTGCTCCCCCAGAGTTCCTGCTCTCTGTACTGAGCGTTGGATCAAAAATACTGCTCCTGCTTGCAAATGCACCTTCT…	TAACCTGGTCTGAAGGACTCAAATT	ATACACAAAGGTATTTTGGGACTGC	424
KKH-tbx5-T2-OT2	AGAACTGTtGCTGttATTTCATGAAAT	Chr01	36817869	+	3	CTAACTGGATTCTTAACTCTATTGTCTCCTAAGACTCTGCAGTTATAATAATATTTGTGTTTGCTTCAATGGGATGCAGCTGTTGTTTGTGTGTGTTGCAAAGATTCTTCTGCTTAGCACCACTTATACAGTAAAGTGCTTCAGGAGATGATAGCTCTGTATAAATAATAATAAAGTTCCCTGTGCCTAGACACAAAGACAAAAACAGGCAACATATACTTATCGTAAGATATGTCTTCCCAAGGGTGAATACAACTGCAATCAGCCATTCTGTATGCCGGTATGCAAGAATGAAGGGATGTGTAGCACATAACTTTGTTCCTTGTCATCTATTTGCAATTCCCTTTCTGTACAGAAGATGTGACAACTGAACCGTGTTTGTTCATCAGCCCTTTGACC…	ATCTAAGGATTTGCTAACATGGGCA	GAAGGAGCATCAGCACTGAAGGT	421
KKH-tbx5-T2-OT3	AGAACTGaGGCTGAAAaaTCACTTGAT	Chr01	128433323	-	3	ATAAAAATAATTATTTACTGAGAATACATTTGAAGTTAAAAAAAGACACTTGTTTTTCCCAACACCTGCCATTTAAGAAAGTCAGCAGAGCGTTACTTTCAGATCTAATTCTAGAGACAGACACACCCGTAACATCTGTTTGTGCTTAGTGCCACCTGTGCAAGTGCAGTTTCACTTCCCTCTGATAATGAAAACCGCATACATTGATAAAAATGTTCCCATTTTTAAAAAAAATATATGAACTTATCAAATAATCATTCTAAATAATAAGTATTTTTGTAGAGTTATAGAAATATATTAAATAAATGTAATTCATGTTAAATATCCACATGCAAGTATAATCATTTAATATCAAATAATAGAACTAAACTAGATATTGAGATCTAGACATATTTATTA…	CAACAGGGCACATTAACAATTAGTCT	GTGACGACTGGTTCGCTTACTGG	329
KKH-tbx5-T2-OT4	AGAAgTGTccCTGAAATTTCAAGTGAT	Chr02	83082528	-	3	CTCAGGGGGACTGTAAGGGGAAACACTAAGAGCAGACACGTGGGCGATCATGTCGGGTCCTACAACAATCTGTGCCGATGGTCTAACACAGTGCTGTCCAACTGGAGCCCCGCGGTCCGACCCCCCTTTGTGTGGCCCCCCACCTGTCTGGCTGCTTTGATGGCTTACCTTTGAGTAAGCTTTAAATGGTATAAGTACTGAGATGAACTGGACATGCAGAGTATGGCACACACAGGCAGCATAGGGCAGGCAGAGTACTGCCCGTGTGTGCCATACTCTGCATGTCCTATTCTGCCTGTGTGTGCCATACTCTGCATGCCCTATGCTGCCTGTGGGAGGTGAACCTGGCAGTGTTTTTTTTCTGGGAGTTTGTTAGCAGGAGAGGAGGAGGCATATGGA…	ATCATTCCAAGAATCGGAGCCTAA	GATGCAACCCACAAAACTTGATAAC	480
KKH-tbx5-T2-OT5	AaAAtTGTGGCTGAAATTgCACTTAAT	Chr04	109680350	-	3	GACAGTTTAAACCTCTGAGATAGCTTTTTGTAGCCTTCCCCTAATCCAAGAGATTTGTTCTTGTTGATCTTTTGAGAGTTGCTTTGAGGATCCCAAGCTGTCACTCTTCAGTGGAGAGTCAAACAGAAGCGCAACTTGCAATTGGCCACCTTATATACCTTTTCTCATGATTGGACACACCTGCCTAGGAAGTTCAAGGCTTAACAAGCTAATCCAACCAATTTGGTGTTGCCAGTAATCAGTATTGAGCAGTTACATGCATTCGAATGAGCAAAATTACAAGCGTACCCAAATTTTAGCACAGCCAGTCTCCTCCAGCAAGTCAGGTCTGTCACTGTGCTGCCTCGTGTTACATTGATTCAAATACCAGAGCCCCCAGGGCAGAGAGCAGAAAAGGAC…	AGATCAAAGGGAAATGAGTGACTTT	AACTGCTGCATATACTGACGCCTT	350
KKH-tbx5-T2-OT6	AGcACaGTGGCTGAAAaTTCAGATGGT	Chr05	97941012	+	3	ACAGAATATAAATGTAACAATACAAGGCTGTGTAGTCATAAATATAGATAAAGACTACACAGCAGGTCAATGACCAGTGCAATTAGTATCAGAATTTATTAATCAGCTCAGTAGCATCATCTTATATGACAGGCCAACTTCATTTTCTGCTTAATAATTTGCAACAGCCCCTAAGCTTAGCTTCTTACCAGCTTCTCACTAGCTGCCCAGAGCACACTGAGCATGTGTGTTACTGACACTTTCCAAGATGGGGAGCTCTTGTGACAAGTTTGAAGTTCTGGATCATTGCTGCTATAGAGATGCAGAGCACAGCTATGTTAGATGCAAGGAAGCCCTGTTCCATTTGCCAACTCTGTATTAATAAAGGATTTTCCTTTATGAAAAAGGTGGAACAGCCTG…	TCCTTCCAAGTCTTAAGCTGAAACC	GGTTGCAAGTCTAGGGAATGGTTTA	348
KKH-tbx5-T2-OT7	AGAACTGTccCTGAAtTTTCAAGTGAT	Chr07	99908008	+	3	TGTTTGTATTCAAGCAAAACTTGCCCCCAAGTCAAGAATTCAAAAATAACTCCCTGGTTTGGGGGCACTGAGAGCAACATCTAACGGGAACCAGGCACCTCAATATAATCCACAGAAAAAAAGGAAACTCCAATGCTTCTATAAATCATACGCATCCCATAATACTTACAGCCAAGGTTGAGAGTCAGGGGGCTGCTGGTCTCACTATTCACACTGTTAGAGGCAGTGCAGGTAAAGGATCCACTGTCTGTTCTCTCCACAGGGCTGATAATGAGGCTGGAGTTGGAATTCATTAAGTGATACCTGGGGTTTGTGGGTAATGGTGCCCCATCCAGGTGCCAGGAGAAGGTGACATTAGTGCCAAGAGCTGAACATGTGAGTCTCACTGAATCCTTCCCA…	GAGAGTTCCAGAGACAGGCAGAA	GGCAAGCTTTAGTTTTACTGTTTGA	496
KKH-tbx5-T2-OT8	AGAACTGTccCTGAAtTTTCAAGTGAT	Chr07	100091426	+	3	TATTCAGACTGTTAGAGGCAGTGCAGGTAAAGGATCCATTGTCTGTTCTCTCCACAGGGCTGATAATGAGGCTGGAGTTGGAATTCATTAAGTGATACCTGGGGTTTGTGGGTAATGGTGCCCCATCCAGGTGCCAGGAGAAGGTGACATTAGTGCCAAGAGCAGAACATGTGAGTCTCACTGAATCCTTCCCAGGACACAGCAGCCCAGAAGATGCATTACTGCTCAGTGCCACCCCAGGTACAGGTTCTGCCAACCAGAGAACAAGATCATTATCATCATCTTCATTTATTTATATAGAGTCAGTGTGGTTACAGAATAAAAATAGCTCACAAGAGTTTAGGGGTCTGGCACATGGGGCGATTAGTTGCCCGCCTTGAGAGGAAACTTCCGCGATTT…	TGCAGGCAATTTCTATGCTTTTAC	TTTCACTGCATATCATAATTGTATGAC	409
KKH-tbx5-T2-OT9	AGgACTtTGGCTGAAcTTTCATATGGT	Chr09	35871868	+	3	CTAGTGATATAAACCCTTTGAACAAATTTAACAATAAATTTGGTATAAAAATCTAGGTTTAATCAATAGGCGTTAAATGTTGATTTGTTGATTGCTTAGAAATAATCAATGCTTCTAGGTAATAAAACACTGTGAAGTATTACATCAGACCTAAAGTAGCTGTTAAATTATGGACATGTAATTTAACAGATTACCTGCACCGCATGTTAAACAGTCTATTTATGTTATTCTTTTGTTATACCCCATATATTTTAATGAAGGCTACAGTATTTTTATATATTTATGAATATATTTTTATAAAGCCTGTTGTTCATCATATATATATATATATATATATATATATATATATATATATATATATATATATATAAATACACAAGAGCCATGAATATCCTGTAA…	TATATTAACGTCCAAAAGGGTGCTG	CACCACAAAATAGTCACACCTCATG	459
KKH-tyr-T2-OT1	AGAAAGGAGATgaTCtGAATGGGTGAT	Chr08	53657058	-	3	CCCTCTTTCCATTTTCAAAATGTTGGGAGGTATGTACTCAAGGTGAGGCCTTACCAGAGACCTACAGTATAAAGAGGCAAAATTATGTTTTCATCCCTTGAGTTAATACCCTTTTTATGCAAGCTTACTAGCCTGTGTTTAGAGAGGGAGGTGGTAACATCAAGAGAGTGAGGATAAGGCATGTCAGGGTGAAGAATTTGTGCTATAGGGTCCATGGGAGGTCCTGGAGAGGGAGGAAGAGTGCTCAAAAGTGCAGCAGGGGGAGAAATTTGAAAAACCGGCCCTATCAAGTGATTTACTGGCTAGGCCGGTGAATTAGCAGCTCTGTGGCAACCCTATTTAAGTAAAACAAACTGAATGCCATCTTGTTCAGCATGGGTTCAATCAACAGGACTTATG…	AGGACTGTCAGCGAGTGCATGA	GTGGGTAATGGTGCTAAATAGTTCC	287

## Sheet: Table S3
Table S3. Sequences of all Cas9s tested in this study.
pCS2-VQR Cas9	cgccattctgcctggggacgtcggagcaagcttgatttaggtgacactatagaatacaagctacttgttctttttgcaggatcccatcgattcgaattcatggactataaggaccacgacggagactacaaggatcatgatattgattacaaagacgatgacgataagatggccccaaagaagaagcggaaggtcggtatccacggagtcccagcagccgacaagaagtacagcatcggcctggacatcggcaccaactctgtgggctgggccgtgatcaccgacgagtacaaggtgcccagcaagaaattcaaggtgctgggcaacaccgaccggcacagcatcaagaagaacctgatcggagccctgctgttcgacagcggcgaaacagccgaggcc…
pCS2-SpG Cas9	cgccattctgcctggggacgtcggagcaagcttgatttaggtgacactatagaatacaagctacttgttctttttgcaggatcccatcgattcgaattcatggactataaggaccacgacggagactacaaggatcatgatattgattacaaagacgatgacgataagatggccccaaagaagaagcggaaggtcggtatccacggagtcccagcagccgacaagaagtacagcatcggcctggacatcggcaccaactctgtgggctgggccgtgatcaccgacgagtacaaggtgcccagcaagaaattcaaggtgctgggcaacaccgaccggcacagcatcaagaagaacctgatcggagccctgctgttcgacagcggcgaaacagccgaggcc…
pCS2-SpRY Cas9	cgccattctgcctggggacgtcggagcaagcttgatttaggtgacactatagaatacaagctacttgttctttttgcaggatcccatcgattcgaattcatgAAGCGGACCGCCGACGGAAGCGAGTTCGAGAGCccaaagaagaagcggaaggtcggtAGCgacaagaagtacagcatcggcctggacatcggcaccaactctgtgggctgggccgtgatcaccgacgagtacaaggtgcccagcaagaaattcaaggtgctgggcaacaccgaccggcacagcatcaagaagaacctgatcggagccctgctgttcgacagcggcgaaacagccgagCGGacccggctgaagagaaccgccagaagaagatacaccagacggaagaaccggatctgc…
pCS2-xCas9 3.7	cgccattctgcctggggacgtcggagcaagcttgatttaggtgacactatagaatacaagctacttgttctttttgcaggatcccatcgattcgaattcatgGACTATAAGGACCACGACGGAGACTACAAGGATCATGATATTGATTACAAAGACGATGACGATAAGATGGCCccaaagaagaagcggaaggtcggtatccacggagtcccagcagccgacaagaagtacagcatcggcctggacatcggcaccaactctgtgggctgggccgtgatcaccgacgagtacaaggtgcccagcaagaaattcaaggtgctgggcaacaccgaccggcacagcatcaagaagaacctgatcggagccctgctgttcgacagcggcgaaacagccgaggcc…
pCS2-iSpyMac	cgccattctgcctggggacgtcggagcaagcttgatttaggtgacactatagaatacaagctacttgttctttttgcaggatcccatcgattcgaattcatggactataaggaccacgacggagactacaaggatcatgatattgattacaaagacgatgacgataagatggccccaaagaagaagcggaaggtcggtatccacggagtcccagcagccgacaagaagtacagcatcggcctggacatcggcaccaactctgtgggctgggccgtgatcaccgacgagtacaaggtgcccagcaagaaattcaaggtgctgggcaacaccgaccggcacagcatcaagaagaacctgatcggagccctgctgttcgacagcggcgaaacagccgaggcc…
pCS2-SaCas9	cgccattctgcctggggacgtcggagcaagcttgatttaggtgacactatagaatacaagctacttgttctttttgcaggatcccatcgattcgaattcatggactataaggaccacgacggagactacaaggatcatgatattgattacaaagacgatgacgataagatggccccaaagaagaagcggaaggtcggtatccacggagtcccagcagccgggaaacggaactacatcctggggcttgacattgggataaccagcgttggctacggaattattgattatgagacacgcgatgtgattgacgccggggttaggctgttcaaagaggccaacgttgaaaacaacgagggaagacggagtaagcgcggagcaagaagactcaagcgcagacgg…
pCS2-KKH SaCas9	cgccattctgcctggggacgtcggagcaagcttgatttaggtgacactatagaatacaagctacttgttctttttgcaggatcccatcgattcgaattcatggactataaggaccacgacggagactacaaggatcatgatattgattacaaagacgatgacgataagatggccccaaagaagaagcggaaggtcggtatccacggagtcccagcagccgggaaacggaactacatcctggggcttgacattgggataaccagcgttggctacggaattattgattatgagacacgcgatgtgattgacgccggggttaggctgttcaaagaggccaacgttgaaaacaacgagggaagacggagtaagcgcggagcaagaagactcaagcgcagacgg…

## Sheet: Table S4
Table S4. List of gRNA targeting sequences for various SpCas9 variants , PCR primers for the amplification of gRNA transcription templates, and PCR primers for detecting the targeted loci.
Nuclease	target name	target sequence (5'-3')	PAM (5'-3')	gRNA in vitro transcription PCR template (gRNA backbone)	gRNA-F(T7 promoter+target+ partial gRNA backbone)(5'-3')	gRNA-R (5'-3')	detection primer F (5'-3')	detection primer R (5'-3')	detection fargment length (bp)
VQR-Cas9	VQR-rad21	ATGGAACTCCTCAGGCAGAG	TGA	GTTTTAGAGCTAGAAATAGCAAGTTAAAATAAGGCTAGTCCGTTATCAACTTGAAAAAGTGGCACCGAGTCGGTGCTTTT	CTAATACGACTCACTATAGAAATGGAACTCCTCAGGCAGAGGTTTTAGAGCTAGAAATAGCAAGTT	AAAAAAGCACCGACTCGGTGCCAC	CCACCTTTAACCTCCTCTTTTGTTT	GGATATCATAACAAGTCCTTGGCAA	246
	VQR-pten	TGCCATGGGCTTTCCTGCAG	AGA	GTTTTAGAGCTAGAAATAGCAAGTTAAAATAAGGCTAGTCCGTTATCAACTTGAAAAAGTGGCACCGAGTCGGTGCTTTT	CTAATACGACTCACTATAGAATGCCATGGGCTTTCCTGCAGGTTTTAGAGCTAGAAATAGCAAGTT	AAAAAAGCACCGACTCGGTGCCAC	TTTCTTGTTTCGCTGCTGGTTT	ACAGGTTATAGAAGATTGCGGTTAG	164
	VQR-braf	GTTCCAGGGCTTCCGCTGCC	AGA	GTTTTAGAGCTAGAAATAGCAAGTTAAAATAAGGCTAGTCCGTTATCAACTTGAAAAAGTGGCACCGAGTCGGTGCTTTT	CTAATACGACTCACTATAGAAGTTCCAGGGCTTCCGCTGCCGTTTTAGAGCTAGAAATAGCAAGTT	AAAAAAGCACCGACTCGGTGCCAC	TGCCACTCAGCCCTGTTCCTT	GGCACTTACTCTAGACGGTCGTAGT	193
	VQR-slc45a2	TCATTATCGCTACCTGTGCC	TGA	GTTTTAGAGCTAGAAATAGCAAGTTAAAATAAGGCTAGTCCGTTATCAACTTGAAAAAGTGGCACCGAGTCGGTGCTTTT	CTAATACGACTCACTATAGAATCATTATCGCTACCTGTGCCGTTTTAGAGCTAGAAATAGCAAGTT	AAAAAAGCACCGACTCGGTGCCAC	ATACATGATTTTAATGGCTATGGT	GGCACAGTTATACTGAGGAGCATTT	240
SpG-Cas9	SpG-rad21-NGT	AAAATGTTTTACGCTCACTT	TGT	GTTTTAGAGCTAGAAATAGCAAGTTAAAATAAGGCTAGTCCGTTATCAACTTGAAAAAGTGGCACCGAGTCGGTGCTTTT	CTAATACGACTCACTATAGAAAAAATGTTTTACGCTCACTTGTTTTAGAGCTAGAAATAGCAAGTT	AAAAAAGCACCGACTCGGTGCCAC	GACAGACTTCCTGGGAAAGACATAT	AACACATGGGCTTTGGTTAACTTCT	230
	SpG-rad21-NGA	ATGGAACTCCTCAGGCAGAG	TGA	GTTTTAGAGCTAGAAATAGCAAGTTAAAATAAGGCTAGTCCGTTATCAACTTGAAAAAGTGGCACCGAGTCGGTGCTTTT	CTAATACGACTCACTATAGAAATGGAACTCCTCAGGCAGAGGTTTTAGAGCTAGAAATAGCAAGTT	AAAAAAGCACCGACTCGGTGCCAC	CCACCTTTAACCTCCTCTTTTGTTT	GGATATCATAACAAGTCCTTGGCAA	246
	SpG-hdac4-NGC	GCTAGAACAACACGCCCTCC	AGC	GTTTTAGAGCTAGAAATAGCAAGTTAAAATAAGGCTAGTCCGTTATCAACTTGAAAAAGTGGCACCGAGTCGGTGCTTTT	CTAATACGACTCACTATAGAAGCTAGAACAACACGCCCTCCGTTTTAGAGCTAGAAATAGCAAGTT	AAAAAAGCACCGACTCGGTGCCAC	CTTATTTCCCAGCAGGGCAGAC	AGCTGAAACAAAATCCTTACGATAG	230
	SpG-best1-NGT	GGGACAGTATGAGAGTGTCC	CGT	GTTTTAGAGCTAGAAATAGCAAGTTAAAATAAGGCTAGTCCGTTATCAACTTGAAAAAGTGGCACCGAGTCGGTGCTTTT	CTAATACGACTCACTATAGAAGGGACAGTATGAGAGTGTCCGTTTTAGAGCTAGAAATAGCAAGTT	AAAAAAGCACCGACTCGGTGCCAC	TCACCAAATGCCCAGTTAGCCAG	AGCATCCTTCCTCTCTCATCCGTTC	205
	SpG-pten-NGA	TGCCATGGGCTTTCCTGCAG	AGA	GTTTTAGAGCTAGAAATAGCAAGTTAAAATAAGGCTAGTCCGTTATCAACTTGAAAAAGTGGCACCGAGTCGGTGCTTTT	CTAATACGACTCACTATAGAATGCCATGGGCTTTCCTGCAGGTTTTAGAGCTAGAAATAGCAAGTT	AAAAAAGCACCGACTCGGTGCCAC	TTTCTTGTTTCGCTGCTGGTTT	ACAGGTTATAGAAGATTGCGGTTAG	164
	SpG-braf-NGA	GTTCCAGGGCTTCCGCTGCC	AGA	GTTTTAGAGCTAGAAATAGCAAGTTAAAATAAGGCTAGTCCGTTATCAACTTGAAAAAGTGGCACCGAGTCGGTGCTTTT	CTAATACGACTCACTATAGAAGTTCCAGGGCTTCCGCTGCCGTTTTAGAGCTAGAAATAGCAAGTT	AAAAAAGCACCGACTCGGTGCCAC	TGCCACTCAGCCCTGTTCCTT	GGCACTTACTCTAGACGGTCGTAGT	193
	SpG-braf-NGT	ATTCAACATTTTCACTGCTA	CGT	GTTTTAGAGCTAGAAATAGCAAGTTAAAATAAGGCTAGTCCGTTATCAACTTGAAAAAGTGGCACCGAGTCGGTGCTTTT	CTAATACGACTCACTATAGAAATTCAACATTTTCACTGCTAGTTTTAGAGCTAGAAATAGCAAGTT	AAAAAAGCACCGACTCGGTGCCAC	CATTGTATTACCAAATTCCAACCGC	ACGCACACTTACCTGAGGACTCCTA	201
	SpG-slc45a2-NGA	TCATTATCGCTACCTGTGCC	TGA	GTTTTAGAGCTAGAAATAGCAAGTTAAAATAAGGCTAGTCCGTTATCAACTTGAAAAAGTGGCACCGAGTCGGTGCTTTT	CTAATACGACTCACTATAGAATCATTATCGCTACCTGTGCCGTTTTAGAGCTAGAAATAGCAAGTT	AAAAAAGCACCGACTCGGTGCCAC	ATACATGATTTTAATGGCTATGGT	GGCACAGTTATACTGAGGAGCATTT	240
SpRY-Cas9	SpRY-nfyc_NAT	AAACATGTCTGCAGATGGGT	CAT	GTTTTAGAGCTAGAAATAGCAAGTTAAAATAAGGCTAGTCCGTTATCAACTTGAAAAAGTGGCACCGAGTCGGTGCTTTT	CTAATACGACTCACTATAGAAAAACATGTCTGCAGATGGGTGTTTTAGAGCTAGAAATAGCAAGTT	AAAAAAGCACCGACTCGGTGCCAC	AATTACCACAGCTACTGATTTGCAT	TTGCGTATCTCCTCCATAACCCT	161
	SpRY-rad21_NAC	CCTTACAGCGATATCATTGC	CAC	GTTTTAGAGCTAGAAATAGCAAGTTAAAATAAGGCTAGTCCGTTATCAACTTGAAAAAGTGGCACCGAGTCGGTGCTTTT	CTAATACGACTCACTATAGAACCTTACAGCGATATCATTGCGTTTTAGAGCTAGAAATAGCAAGTT	AAAAAAGCACCGACTCGGTGCCAC	TCCATCAGTTTGCTCGACCTGTG	CACAGCTCATTCACGTTCCTGCTA	218
	SpRY-tbx4_NAA	CGGTACAAATTTTGTGACAA	CAA	GTTTTAGAGCTAGAAATAGCAAGTTAAAATAAGGCTAGTCCGTTATCAACTTGAAAAAGTGGCACCGAGTCGGTGCTTTT	CTAATACGACTCACTATAGAACGGTACAAATTTTGTGACAAGTTTTAGAGCTAGAAATAGCAAGTT	AAAAAAGCACCGACTCGGTGCCAC	TAGGAGAATGTTTCCAAGCTACAAG	TGTCAGATTTGAGACTTTTTCTTCA	216
	SpRY-nfyb-NAC	TAGATGGACGGGGATAGCTC	TAC	GTTTTAGAGCTAGAAATAGCAAGTTAAAATAAGGCTAGTCCGTTATCAACTTGAAAAAGTGGCACCGAGTCGGTGCTTTT	CTAATACGACTCACTATAGAATAGATGGACGGGGATAGCTCGTTTTAGAGCTAGAAATAGCAAGTT	AAAAAAGCACCGACTCGGTGCCAC	TGGAACCAAGTTAGTAATCAGTACC	AGACTTACCATCATGGGGCTGTAT	217
	SpRY-ash1l-NAC	AGGCAGCTGGCCCAGCTTGG	CAC	GTTTTAGAGCTAGAAATAGCAAGTTAAAATAAGGCTAGTCCGTTATCAACTTGAAAAAGTGGCACCGAGTCGGTGCTTTT	CTAATACGACTCACTATAGAAAGGCAGCTGGCCCAGCTTGGGTTTTAGAGCTAGAAATAGCAAGTT	AAAAAAGCACCGACTCGGTGCCAC	AGGCCAAATGCCTAAAGAAAAG	GATGCTACCCTTGCTTGTGTGT	167
	SpRY-best1-NAT	GCTGATTCCTGTGTCATTTG	TAT	GTTTTAGAGCTAGAAATAGCAAGTTAAAATAAGGCTAGTCCGTTATCAACTTGAAAAAGTGGCACCGAGTCGGTGCTTTT	CTAATACGACTCACTATAGAAGCTGATTCCTGTGTCATTTGGTTTTAGAGCTAGAAATAGCAAGTT	AAAAAAGCACCGACTCGGTGCCAC	AATTCAGACTGCTCTGCTACAACAG	ATGAGTGCTGATGACTCCTGAGGT	221
	SpRY-Kras-NAT	GGACAAGAGGAATACAGCGC	CAT	GTTTTAGAGCTAGAAATAGCAAGTTAAAATAAGGCTAGTCCGTTATCAACTTGAAAAAGTGGCACCGAGTCGGTGCTTTT	CTAATACGACTCACTATAGAAGGACAAGAGGAATACAGCGCGTTTTAGAGCTAGAAATAGCAAGTT	AAAAAAGCACCGACTCGGTGCCAC	CGTATCCTCATGTTCCTCCTATGCT	TAACCTGTAATGATGGACATCCTCG	223
	SpRY-pten-NAC	TAACCACTGGTCAAGATCTT	CAC	GTTTTAGAGCTAGAAATAGCAAGTTAAAATAAGGCTAGTCCGTTATCAACTTGAAAAAGTGGCACCGAGTCGGTGCTTTT	CTAATACGACTCACTATAGAATAACCACTGGTCAAGATCTTGTTTTAGAGCTAGAAATAGCAAGTT	AAAAAAGCACCGACTCGGTGCCAC	TTACAGTCATCCTTTACTTGAAGAA	GTAGCAAATAGGCACAAATCATAAC	235
	SpRY-braf_NAT	GTCCCAAACGATCCAGAACC	TAT	GTTTTAGAGCTAGAAATAGCAAGTTAAAATAAGGCTAGTCCGTTATCAACTTGAAAAAGTGGCACCGAGTCGGTGCTTTT	CTAATACGACTCACTATAGAAGTCCCAAACGATCCAGAACCGTTTTAGAGCTAGAAATAGCAAGTT	AAAAAAGCACCGACTCGGTGCCAC	TGCCACTCAGCCCTGTTCCTT	GGCACTTACTCTAGACGGTCGTAGT	193
	SpRY-dph1-NAA	CTGGAGTCTGTTATGATTTC	CAA	GTTTTAGAGCTAGAAATAGCAAGTTAAAATAAGGCTAGTCCGTTATCAACTTGAAAAAGTGGCACCGAGTCGGTGCTTTT	CTAATACGACTCACTATAGAACTGGAGTCTGTTATGATTTCGTTTTAGAGCTAGAAATAGCAAGTT	AAAAAAGCACCGACTCGGTGCCAC	GAAAGTGACATCACAAAATTGCCT	AAAAGTAAATAAAGGGAAAGAAAGC	213
	SpRY-mc1r-NAG	GAGCACCAGACAATTTCCTT	GAG	GTTTTAGAGCTAGAAATAGCAAGTTAAAATAAGGCTAGTCCGTTATCAACTTGAAAAAGTGGCACCGAGTCGGTGCTTTT	CTAATACGACTCACTATAGAAGAGCACCAGACAATTTCCTTGTTTTAGAGCTAGAAATAGCAAGTT	AAAAAAGCACCGACTCGGTGCCAC	TTTCTTGTTTCGCTGCTGGTTT	ACAGGTTATAGAAGATTGCGGTTAG	164
	SpRY-mc1r-NAT	ATGGATTATATATTTGATAC	AAT	GTTTTAGAGCTAGAAATAGCAAGTTAAAATAAGGCTAGTCCGTTATCAACTTGAAAAAGTGGCACCGAGTCGGTGCTTTT	CTAATACGACTCACTATAGAAATGGATTATATATTTGATACGTTTTAGAGCTAGAAATAGCAAGTT	AAAAAAGCACCGACTCGGTGCCAC	CTGCCTGGCTGCATCTGATATG	GCAAGGCATAGAAGATGGTGATGTA	218
	SpRY-slc45a2-NAT	GGTTAGATATGCTGTGGAGT	TAT	GTTTTAGAGCTAGAAATAGCAAGTTAAAATAAGGCTAGTCCGTTATCAACTTGAAAAAGTGGCACCGAGTCGGTGCTTTT	CTAATACGACTCACTATAGAAGGTTAGATATGCTGTGGAGTGTTTTAGAGCTAGAAATAGCAAGTT	AAAAAAGCACCGACTCGGTGCCAC	CATTACTCACCGACAATTATAACCA	GGTACTTACATGAATACAACGCTGA	195
	SpRY-slc45a2-NAG	TCCGAGCATAGTAATCACAA	TAG	GTTTTAGAGCTAGAAATAGCAAGTTAAAATAAGGCTAGTCCGTTATCAACTTGAAAAAGTGGCACCGAGTCGGTGCTTTT	CTAATACGACTCACTATAGAATCCGAGCATAGTAATCACAAGTTTTAGAGCTAGAAATAGCAAGTT	AAAAAAGCACCGACTCGGTGCCAC	CCAAAGACATGGAGTTCAGTGCTAG	GCTGATGAGCCAGACAAGACTGTAC	218
	SpRY-best1-NAC	TAGGAGCTAAATTCTCTGAG	GAC	GTTTTAGAGCTAGAAATAGCAAGTTAAAATAAGGCTAGTCCGTTATCAACTTGAAAAAGTGGCACCGAGTCGGTGCTTTT	CTAATACGACTCACTATAGAATAGGAGCTAAATTCTCTGAGGTTTTAGAGCTAGAAATAGCAAGTT	AAAAAAGCACCGACTCGGTGCCAC	ATACATGATTTTAATGGCTATGGT	GGCACAGTTATACTGAGGAGCATTT	240
iSpyMac	iSpyMac-tbx4	CGGTACAAATTTTGTGACAA	CAA	GTTTTAGAGCTAGAAATAGCAAGTTAAAATAAGGCTAGTCCGTTATCAACTTGAAAAAGTGGCACCGAGTCGGTGCTTTT	CTAATACGACTCACTATAGAACGGTACAAATTTTGTGACAAGTTTTAGAGCTAGAAATAGCAAGTT	AAAAAAGCACCGACTCGGTGCCAC	TAGGAGAATGTTTCCAAGCTACAAG	TGTCAGATTTGAGACTTTTTCTTCA	216
	iSpyMac-mc1r-T1	AATGGATTATATATTTGATA	CAA	GTTTTAGAGCTAGAAATAGCAAGTTAAAATAAGGCTAGTCCGTTATCAACTTGAAAAAGTGGCACCGAGTCGGTGCTTTT	CTAATACGACTCACTATAGAAAATGGATTATATATTTGATAGTTTTAGAGCTAGAAATAGCAAGTT	AAAAAAGCACCGACTCGGTGCCAC	CTGCCTGGCTGCATCTGATATG	GCAAGGCATAGAAGATGGTGATGTA	218
	iSpyMac-mc1r-T2	TATAATCCCTTGCTTAAGCA	TAA	GTTTTAGAGCTAGAAATAGCAAGTTAAAATAAGGCTAGTCCGTTATCAACTTGAAAAAGTGGCACCGAGTCGGTGCTTTT	CTAATACGACTCACTATAGAATATAATCCCTTGCTTAAGCAGTTTTAGAGCTAGAAATAGCAAGTT	AAAAAAGCACCGACTCGGTGCCAC	CTGCCTGGCTGCATCTGATATG	GCAAGGCATAGAAGATGGTGATGTA	218
	iSpyMac-slc45a2	CCACAGCATATCTAACCTAT	GAA	GTTTTAGAGCTAGAAATAGCAAGTTAAAATAAGGCTAGTCCGTTATCAACTTGAAAAAGTGGCACCGAGTCGGTGCTTTT	CTAATACGACTCACTATAGAACCACAGCATATCTAACCTATGTTTTAGAGCTAGAAATAGCAAGTT	AAAAAAGCACCGACTCGGTGCCAC	CATTACTCACCGACAATTATAACCA	GGTACTTACATGAATACAACGCTGA	195
xCas9 3.7	x3.7-tyr-ATG	GGGGGAGAGTGAGGAGCAGC	ATG	GTTTTAGAGCTAGAAATAGCAAGTTAAAATAAGGCTAGTCCGTTATCAACTTGAAAAAGTGGCACCGAGTCGGTGCTTTT	CTAATACGACTCACTATAGAAGGGGGAGAGTGAGGAGCAGCGTTTTAGAGCTAGAAATAGCAAGTT	AAAAAAGCACCGACTCGGTGCCAC	GGAGGGGTTCTGTACTTTGAGGAAT	GCAGACACCCCTTCCTGATAGC	346
	x3.7-tyr-CAG	GGAGGAAGAAGAACAGGCAG	CAG	GTTTTAGAGCTAGAAATAGCAAGTTAAAATAAGGCTAGTCCGTTATCAACTTGAAAAAGTGGCACCGAGTCGGTGCTTTT	CTAATACGACTCACTATAGAAGGAGGAAGAAGAACAGGCAGGTTTTAGAGCTAGAAATAGCAAGTT	AAAAAAGCACCGACTCGGTGCCAC	GGAGGGGTTCTGTACTTTGAGGAAT	GCAGACACCCCTTCCTGATAGC	346
	x3.7-tyr-GGA	GAACTGGCCCCTGCAAACAT	GGA	GTTTTAGAGCTAGAAATAGCAAGTTAAAATAAGGCTAGTCCGTTATCAACTTGAAAAAGTGGCACCGAGTCGGTGCTTTT	CTAATACGACTCACTATAGAAGAACTGGCCCCTGCAAACATGTTTTAGAGCTAGAAATAGCAAGTT	AAAAAAGCACCGACTCGGTGCCAC	GGAGGGGTTCTGTACTTTGAGGAAT	GCAGACACCCCTTCCTGATAGC	346
	x3.7-tyr-CTG	GTGCTACATGCCCTTGGGAA	CTG	GTTTTAGAGCTAGAAATAGCAAGTTAAAATAAGGCTAGTCCGTTATCAACTTGAAAAAGTGGCACCGAGTCGGTGCTTTT	CTAATACGACTCACTATAGAAGTGCTACATGCCCTTGGGAAGTTTTAGAGCTAGAAATAGCAAGTT	AAAAAAGCACCGACTCGGTGCCAC	GGAGGGGTTCTGTACTTTGAGGAAT	GCAGACACCCCTTCCTGATAGC	346
	x3.7-tyr-CCG	GTTCCCAAGGGCATGTAGCA	CCG	GTTTTAGAGCTAGAAATAGCAAGTTAAAATAAGGCTAGTCCGTTATCAACTTGAAAAAGTGGCACCGAGTCGGTGCTTTT	CTAATACGACTCACTATAGAAGTTCCCAAGGGCATGTAGCAGTTTTAGAGCTAGAAATAGCAAGTT	AAAAAAGCACCGACTCGGTGCCAC	GGAGGGGTTCTGTACTTTGAGGAAT	GCAGACACCCCTTCCTGATAGC	346
	x3.7-tyr-TCG	GGGCATGTAGCACCGCAGAG	TCG	GTTTTAGAGCTAGAAATAGCAAGTTAAAATAAGGCTAGTCCGTTATCAACTTGAAAAAGTGGCACCGAGTCGGTGCTTTT	CTAATACGACTCACTATAGAAGGGCATGTAGCACCGCAGAGGTTTTAGAGCTAGAAATAGCAAGTT	AAAAAAGCACCGACTCGGTGCCAC	GGAGGGGTTCTGTACTTTGAGGAAT	GCAGACACCCCTTCCTGATAGC	346
	x3.7-tyr-GAG	GGGCAACACTCCTTGCTCAG	GAG	GTTTTAGAGCTAGAAATAGCAAGTTAAAATAAGGCTAGTCCGTTATCAACTTGAAAAAGTGGCACCGAGTCGGTGCTTTT	CTAATACGACTCACTATAGAAGGGCAACACTCCTTGCTCAGGTTTTAGAGCTAGAAATAGCAAGTT	AAAAAAGCACCGACTCGGTGCCAC	CCAGTCCTATAGATCAGGCTCGG	CATCCAGACAAAGAGGTCATACACG	591
	x3.7-tyr-GGT	GTGGCCAGCTATCAGGAAGG	GGT	GTTTTAGAGCTAGAAATAGCAAGTTAAAATAAGGCTAGTCCGTTATCAACTTGAAAAAGTGGCACCGAGTCGGTGCTTTT	CTAATACGACTCACTATAGAAGTGGCCAGCTATCAGGAAGGGTTTTAGAGCTAGAAATAGCAAGTT	AAAAAAGCACCGACTCGGTGCCAC	CCAGTCCTATAGATCAGGCTCGG	CATCCAGACAAAGAGGTCATACACG	591
	x3.7-tyr-TGT	GGCCAGCTATCAGGAAGGGG	TGT	GTTTTAGAGCTAGAAATAGCAAGTTAAAATAAGGCTAGTCCGTTATCAACTTGAAAAAGTGGCACCGAGTCGGTGCTTTT	CTAATACGACTCACTATAGAAGGCCAGCTATCAGGAAGGGGGTTTTAGAGCTAGAAATAGCAAGTT	AAAAAAGCACCGACTCGGTGCCAC	CCAGTCCTATAGATCAGGCTCGG	CATCCAGACAAAGAGGTCATACACG	591
	x3.7-tyr-AGA	GGTCAGGACAACATCCTGGC	AGA	GTTTTAGAGCTAGAAATAGCAAGTTAAAATAAGGCTAGTCCGTTATCAACTTGAAAAAGTGGCACCGAGTCGGTGCTTTT	CTAATACGACTCACTATAGAAGGTCAGGACAACATCCTGGCGTTTTAGAGCTAGAAATAGCAAGTT	AAAAAAGCACCGACTCGGTGCCAC	CCAGTCCTATAGATCAGGCTCGG	CATCCAGACAAAGAGGTCATACACG	591
	x3.7-tyr-AGC	GCCAGGATGTTGTCCTGACC	AGC	GTTTTAGAGCTAGAAATAGCAAGTTAAAATAAGGCTAGTCCGTTATCAACTTGAAAAAGTGGCACCGAGTCGGTGCTTTT	CTAATACGACTCACTATAGAAGCCAGGATGTTGTCCTGACCGTTTTAGAGCTAGAAATAGCAAGTT	AAAAAAGCACCGACTCGGTGCCAC	CCAGTCCTATAGATCAGGCTCGG	CATCCAGACAAAGAGGTCATACACG	591
	x3.7-tyr-TGC	GATGTTGTCCTGACCAGCTC	TGC	GTTTTAGAGCTAGAAATAGCAAGTTAAAATAAGGCTAGTCCGTTATCAACTTGAAAAAGTGGCACCGAGTCGGTGCTTTT	CTAATACGACTCACTATAGAAGATGTTGTCCTGACCAGCTCGTTTTAGAGCTAGAAATAGCAAGTT	AAAAAAGCACCGACTCGGTGCCAC	CCAGTCCTATAGATCAGGCTCGG	CATCCAGACAAAGAGGTCATACACG	591
	x3.7-tyr-TAG	GAATGGAAACTGAGGGCCAG	TAG	GTTTTAGAGCTAGAAATAGCAAGTTAAAATAAGGCTAGTCCGTTATCAACTTGAAAAAGTGGCACCGAGTCGGTGCTTTT	CTAATACGACTCACTATAGAAGAATGGAAACTGAGGGCCAGGTTTTAGAGCTAGAAATAGCAAGTT	AAAAAAGCACCGACTCGGTGCCAC	CCAGTCCTATAGATCAGGCTCGG	CATCCAGACAAAGAGGTCATACACG	591
	x3.7-tyr-GGC	GGTTGACGATAGAGAGAACT	GGC	GTTTTAGAGCTAGAAATAGCAAGTTAAAATAAGGCTAGTCCGTTATCAACTTGAAAAAGTGGCACCGAGTCGGTGCTTTT	CTAATACGACTCACTATAGAAGGTTGACGATAGAGAGAACTGTTTTAGAGCTAGAAATAGCAAGTT	AAAAAAGCACCGACTCGGTGCCAC	CCAGTCCTATAGATCAGGCTCGG	CATCCAGACAAAGAGGTCATACACG	591
	x3.7-tyr-TGA	GTCTGCACAGTTATAGCCCA	TGA	GTTTTAGAGCTAGAAATAGCAAGTTAAAATAAGGCTAGTCCGTTATCAACTTGAAAAAGTGGCACCGAGTCGGTGCTTTT	CTAATACGACTCACTATAGAAGTCTGCACAGTTATAGCCCAGTTTTAGAGCTAGAAATAGCAAGTT	AAAAAAGCACCGACTCGGTGCCAC	CCAGTCCTATAGATCAGGCTCGG	CATCCAGACAAAGAGGTCATACACG	591
	x3.7-tyr-AAG	GGGCCAAACTGCACAGAGAG	AAG	GTTTTAGAGCTAGAAATAGCAAGTTAAAATAAGGCTAGTCCGTTATCAACTTGAAAAAGTGGCACCGAGTCGGTGCTTTT	CTAATACGACTCACTATAGAAGGGCCAAACTGCACAGAGAGGTTTTAGAGCTAGAAATAGCAAGTT	AAAAAAGCACCGACTCGGTGCCAC	CCAGTCCTATAGATCAGGCTCGG	CATCCAGACAAAGAGGTCATACACG	591
	x3.7-tyr-TTG	GAATATCTCCTTTCTTATCA	TTG	GTTTTAGAGCTAGAAATAGCAAGTTAAAATAAGGCTAGTCCGTTATCAACTTGAAAAAGTGGCACCGAGTCGGTGCTTTT	CTAATACGACTCACTATAGAAGAATATCTCCTTTCTTATCAGTTTTAGAGCTAGAAATAGCAAGTT	AAAAAAGCACCGACTCGGTGCCAC	CCAGTCCTATAGATCAGGCTCGG	CATCCAGACAAAGAGGTCATACACG	591
	x3.7-tyr-GTG	GGAGATATTCCGAATGAGCA	GTG	GTTTTAGAGCTAGAAATAGCAAGTTAAAATAAGGCTAGTCCGTTATCAACTTGAAAAAGTGGCACCGAGTCGGTGCTTTT	CTAATACGACTCACTATAGAAGGAGATATTCCGAATGAGCAGTTTTAGAGCTAGAAATAGCAAGTT	AAAAAAGCACCGACTCGGTGCCAC	CCAGTCCTATAGATCAGGCTCGG	CATCCAGACAAAGAGGTCATACACG	591
	x3.7-tyr-CGC	GTCATAGTCACTGGCACCTA	CGC	GTTTTAGAGCTAGAAATAGCAAGTTAAAATAAGGCTAGTCCGTTATCAACTTGAAAAAGTGGCACCGAGTCGGTGCTTTT	CTAATACGACTCACTATAGAAGTCATAGTCACTGGCACCTAGTTTTAGAGCTAGAAATAGCAAGTT	AAAAAAGCACCGACTCGGTGCCAC	GGCCAAACTGCACAGAGAGAA	TGCAATGCAAAGGATTGGGACT	546
	x3.7-tyr-CGT	GGAGCCATTATTCATCTGGG	CGT	GTTTTAGAGCTAGAAATAGCAAGTTAAAATAAGGCTAGTCCGTTATCAACTTGAAAAAGTGGCACCGAGTCGGTGCTTTT	CTAATACGACTCACTATAGAAGGAGCCATTATTCATCTGGGGTTTTAGAGCTAGAAATAGCAAGTT	AAAAAAGCACCGACTCGGTGCCAC	GGCCAAACTGCACAGAGAGAA	TGCAATGCAAAGGATTGGGACT	546
	x3.7-tyr-CGA	GGGTCTTACCTGCCATGAAG	CGA	GTTTTAGAGCTAGAAATAGCAAGTTAAAATAAGGCTAGTCCGTTATCAACTTGAAAAAGTGGCACCGAGTCGGTGCTTTT	CTAATACGACTCACTATAGAAGGGTCTTACCTGCCATGAAGGTTTTAGAGCTAGAAATAGCAAGTT	AAAAAAGCACCGACTCGGTGCCAC	CTTCATAGGAGAAGATGCTCTCTGG	GCTTTACAGGGCAATAGTGTAGCTG	435
	x3.7-p48-TGT	GCATTGGCACGCTTGCTGCT	TGT	GTTTTAGAGCTAGAAATAGCAAGTTAAAATAAGGCTAGTCCGTTATCAACTTGAAAAAGTGGCACCGAGTCGGTGCTTTT	CTAATACGACTCACTATAGAAGCATTGGCACGCTTGCTGCTGTTTTAGAGCTAGAAATAGCAAGTT	AAAAAAGCACCGACTCGGTGCCAC	GCATCCCAGTGCCACATACTAGG	TAGAGGAATGGTCAGTGAAGAAATC	514
	x3.7-p48-AGT	GCTTGCTGCTTGTACCTATA	AGT	GTTTTAGAGCTAGAAATAGCAAGTTAAAATAAGGCTAGTCCGTTATCAACTTGAAAAAGTGGCACCGAGTCGGTGCTTTT	CTAATACGACTCACTATAGAAGCTTGCTGCTTGTACCTATAGTTTTAGAGCTAGAAATAGCAAGTT	AAAAAAGCACCGACTCGGTGCCAC	GCATCCCAGTGCCACATACTAGG	TAGAGGAATGGTCAGTGAAGAAATC	514
	x3.7-p48-GGA	GAACCGAGTGAGGAGCCCCC	GGA	GTTTTAGAGCTAGAAATAGCAAGTTAAAATAAGGCTAGTCCGTTATCAACTTGAAAAAGTGGCACCGAGTCGGTGCTTTT	CTAATACGACTCACTATAGAAGAACCGAGTGAGGAGCCCCCGTTTTAGAGCTAGAAATAGCAAGTT	AAAAAAGCACCGACTCGGTGCCAC	GCATCCCAGTGCCACATACTAGG	TAGAGGAATGGTCAGTGAAGAAATC	514
	x3.7-p48-CGC	GAAACGGTACTGGAGCAGTT	CGC	GTTTTAGAGCTAGAAATAGCAAGTTAAAATAAGGCTAGTCCGTTATCAACTTGAAAAAGTGGCACCGAGTCGGTGCTTTT	CTAATACGACTCACTATAGAAGAAACGGTACTGGAGCAGTTGTTTTAGAGCTAGAAATAGCAAGTT	AAAAAAGCACCGACTCGGTGCCAC	ACGCTTGCTGCTTGTACCTATAA	GCAGTATTCATCATCAGTGTGCAG	361
	x3.7-p48-GGC	GGTACTGGAGCAGTTCGCAG	GGC	GTTTTAGAGCTAGAAATAGCAAGTTAAAATAAGGCTAGTCCGTTATCAACTTGAAAAAGTGGCACCGAGTCGGTGCTTTT	CTAATACGACTCACTATAGAAGGTACTGGAGCAGTTCGCAGGTTTTAGAGCTAGAAATAGCAAGTT	AAAAAAGCACCGACTCGGTGCCAC	ACGCTTGCTGCTTGTACCTATAA	GCAGTATTCATCATCAGTGTGCAG	361
	x3.7-p48-CGT	GCTGGAGTCCTTCCCTTCCC	CGT	GTTTTAGAGCTAGAAATAGCAAGTTAAAATAAGGCTAGTCCGTTATCAACTTGAAAAAGTGGCACCGAGTCGGTGCTTTT	CTAATACGACTCACTATAGAAGCTGGAGTCCTTCCCTTCCCGTTTTAGAGCTAGAAATAGCAAGTT	AAAAAAGCACCGACTCGGTGCCAC	ACGCTTGCTGCTTGTACCTATAA	GCAGTATTCATCATCAGTGTGCAG	361
	x3.7-p48-TAG	GTCTGGGTCCAGGGCGTCCC	TAG	GTTTTAGAGCTAGAAATAGCAAGTTAAAATAAGGCTAGTCCGTTATCAACTTGAAAAAGTGGCACCGAGTCGGTGCTTTT	CTAATACGACTCACTATAGAAGTCTGGGTCCAGGGCGTCCCGTTTTAGAGCTAGAAATAGCAAGTT	AAAAAAGCACCGACTCGGTGCCAC	ACGCTTGCTGCTTGTACCTATAA	GCAGTATTCATCATCAGTGTGCAG	361
	x3.7-p48-GGT	GTCTTCCAAAAAGTCGTCTG	GGT	GTTTTAGAGCTAGAAATAGCAAGTTAAAATAAGGCTAGTCCGTTATCAACTTGAAAAAGTGGCACCGAGTCGGTGCTTTT	CTAATACGACTCACTATAGAAGTCTTCCAAAAAGTCGTCTGGTTTTAGAGCTAGAAATAGCAAGTT	AAAAAAGCACCGACTCGGTGCCAC	GAAACGGTACTGGAGCAGTTCGC	TGTCGGTGTTGGGGTTCCTTAGAG	559
	x3.7-p48-CCG	GTGTGCAGCCCCCGGCTGTC	CCG	GTTTTAGAGCTAGAAATAGCAAGTTAAAATAAGGCTAGTCCGTTATCAACTTGAAAAAGTGGCACCGAGTCGGTGCTTTT	CTAATACGACTCACTATAGAAGTGTGCAGCCCCCGGCTGTCGTTTTAGAGCTAGAAATAGCAAGTT	AAAAAAGCACCGACTCGGTGCCAC	GAAACGGTACTGGAGCAGTTCGC	TGTCGGTGTTGGGGTTCCTTAGAG	559
	x3.7-p48-GAT	GGAAGCCCCCCGAAGAGGAG	GAT	GTTTTAGAGCTAGAAATAGCAAGTTAAAATAAGGCTAGTCCGTTATCAACTTGAAAAAGTGGCACCGAGTCGGTGCTTTT	CTAATACGACTCACTATAGAAGGAAGCCCCCCGAAGAGGAGGTTTTAGAGCTAGAAATAGCAAGTT	AAAAAAGCACCGACTCGGTGCCAC	GAAACGGTACTGGAGCAGTTCGC	TGTCGGTGTTGGGGTTCCTTAGAG	559
	x3.7-p48-AGC	CTCCCCACATTCATAGGGGA	AGC	GTTTTAGAGCTAGAAATAGCAAGTTAAAATAAGGCTAGTCCGTTATCAACTTGAAAAAGTGGCACCGAGTCGGTGCTTTT	CTAATACGACTCACTATAGAACTCCCCACATTCATAGGGGAGTTTTAGAGCTAGAAATAGCAAGTT	AAAAAAGCACCGACTCGGTGCCAC	GAAACGGTACTGGAGCAGTTCGC	TGTCGGTGTTGGGGTTCCTTAGAG	559
	x3.7-p48-CGA	GAATGTGGGGAGGGAGGCTG	CGA	GTTTTAGAGCTAGAAATAGCAAGTTAAAATAAGGCTAGTCCGTTATCAACTTGAAAAAGTGGCACCGAGTCGGTGCTTTT	CTAATACGACTCACTATAGAAGAATGTGGGGAGGGAGGCTGGTTTTAGAGCTAGAAATAGCAAGTT	AAAAAAGCACCGACTCGGTGCCAC	GAAACGGTACTGGAGCAGTTCGC	TGTCGGTGTTGGGGTTCCTTAGAG	559
	x3.7-p48-AGA	GGGAGGGAGTCTGGTGATGA	AGA	GTTTTAGAGCTAGAAATAGCAAGTTAAAATAAGGCTAGTCCGTTATCAACTTGAAAAAGTGGCACCGAGTCGGTGCTTTT	CTAATACGACTCACTATAGAAGGGAGGGAGTCTGGTGATGAGTTTTAGAGCTAGAAATAGCAAGTT	AAAAAAGCACCGACTCGGTGCCAC	GAAACGGTACTGGAGCAGTTCGC	TGTCGGTGTTGGGGTTCCTTAGAG	559
	x3.7-p48-ATG	GGCTGAGGTCGGACGCGGAG	ATG	GTTTTAGAGCTAGAAATAGCAAGTTAAAATAAGGCTAGTCCGTTATCAACTTGAAAAAGTGGCACCGAGTCGGTGCTTTT	CTAATACGACTCACTATAGAAGGCTGAGGTCGGACGCGGAGGTTTTAGAGCTAGAAATAGCAAGTT	AAAAAAGCACCGACTCGGTGCCAC	GAAACGGTACTGGAGCAGTTCGC	TGTCGGTGTTGGGGTTCCTTAGAG	559
	x3.7-p48-GCG	GCGGCCAATGTCAGGGAGCG	GCG	GTTTTAGAGCTAGAAATAGCAAGTTAAAATAAGGCTAGTCCGTTATCAACTTGAAAAAGTGGCACCGAGTCGGTGCTTTT	CTAATACGACTCACTATAGAAGCGGCCAATGTCAGGGAGCGGTTTTAGAGCTAGAAATAGCAAGTT	AAAAAAGCACCGACTCGGTGCCAC	GAAACGGTACTGGAGCAGTTCGC	TGTCGGTGTTGGGGTTCCTTAGAG	559
	x3.7-p48-TGC	GTCATTGATGGACTGCATCC	TGC	GTTTTAGAGCTAGAAATAGCAAGTTAAAATAAGGCTAGTCCGTTATCAACTTGAAAAAGTGGCACCGAGTCGGTGCTTTT	CTAATACGACTCACTATAGAAGTCATTGATGGACTGCATCCGTTTTAGAGCTAGAAATAGCAAGTT	AAAAAAGCACCGACTCGGTGCCAC	GAAACGGTACTGGAGCAGTTCGC	TGTCGGTGTTGGGGTTCCTTAGAG	559
	x3.7-p48-ACG	GCACATCCCCACTCTGCCCT	ACG	GTTTTAGAGCTAGAAATAGCAAGTTAAAATAAGGCTAGTCCGTTATCAACTTGAAAAAGTGGCACCGAGTCGGTGCTTTT	CTAATACGACTCACTATAGAAGCACATCCCCACTCTGCCCT GTTTTAGAGCTAGAAATAGCAAGTT	AAAAAAGCACCGACTCGGTGCCAC	GAAACGGTACTGGAGCAGTTCGC	TGTCGGTGTTGGGGTTCCTTAGAG	559
	x3.7-p48-GAG	GCTACATCAACTTCCTCAGC	GAG	GTTTTAGAGCTAGAAATAGCAAGTTAAAATAAGGCTAGTCCGTTATCAACTTGAAAAAGTGGCACCGAGTCGGTGCTTTT	CTAATACGACTCACTATAGAAGCTACATCAACTTCCTCAGCGTTTTAGAGCTAGAAATAGCAAGTT	AAAAAAGCACCGACTCGGTGCCAC	GGATGCAGTCCATCAATGACGC	GAACTGCAAACGAATTATCTATGGA	468
	x3.7-p48-AAG	GTACAGTCCGACCTGCCTCT	AAG	GTTTTAGAGCTAGAAATAGCAAGTTAAAATAAGGCTAGTCCGTTATCAACTTGAAAAAGTGGCACCGAGTCGGTGCTTTT	CTAATACGACTCACTATAGAAGTACAGTCCGACCTGCCTCTGTTTTAGAGCTAGAAATAGCAAGTT	AAAAAAGCACCGACTCGGTGCCAC	GGATGCAGTCCATCAATGACGC	GAACTGCAAACGAATTATCTATGGA	468
	x3.7-p48-GTG	GTACCCCCAACCTACTGTCT	GTG	GTTTTAGAGCTAGAAATAGCAAGTTAAAATAAGGCTAGTCCGTTATCAACTTGAAAAAGTGGCACCGAGTCGGTGCTTTT	CTAATACGACTCACTATAGAAGTACCCCCAACCTACTGTCTGTTTTAGAGCTAGAAATAGCAAGTT	AAAAAAGCACCGACTCGGTGCCAC	GGATGCAGTCCATCAATGACGC	GAACTGCAAACGAATTATCTATGGA	468
	x3.7-p48-GAA	GGGATGGGGACCCTATAAGG	GAA	GTTTTAGAGCTAGAAATAGCAAGTTAAAATAAGGCTAGTCCGTTATCAACTTGAAAAAGTGGCACCGAGTCGGTGCTTTT	CTAATACGACTCACTATAGAAGGGATGGGGACCCTATAAGGGTTTTAGAGCTAGAAATAGCAAGTT	AAAAAAGCACCGACTCGGTGCCAC	TCCCTGGCATTATTATACGGGTTAT	ACAAGTGGTGATTGCCATTGGAATT	528
	x3.7-p48-TTG	GCAACTGAGAGACCAAAACG	TTG	GTTTTAGAGCTAGAAATAGCAAGTTAAAATAAGGCTAGTCCGTTATCAACTTGAAAAAGTGGCACCGAGTCGGTGCTTTT	CTAATACGACTCACTATAGAAGCAACTGAGAGACCAAAACGGTTTTAGAGCTAGAAATAGCAAGTT	AAAAAAGCACCGACTCGGTGCCAC	TCCCTGGCATTATTATACGGGTTAT	ACAAGTGGTGATTGCCATTGGAATT	528
	x3.7-p48-CAG	GTGTGGACCCCAGAGGACCC	CAG	GTTTTAGAGCTAGAAATAGCAAGTTAAAATAAGGCTAGTCCGTTATCAACTTGAAAAAGTGGCACCGAGTCGGTGCTTTT	CTAATACGACTCACTATAGAAGTGTGGACCCCAGAGGACCCGTTTTAGAGCTAGAAATAGCAAGTT	AAAAAAGCACCGACTCGGTGCCAC	TCCCTGGCATTATTATACGGGTTAT	ACAAGTGGTGATTGCCATTGGAATT	528
	x3.7-p48-TGA	GGGTTCGTTTTCAATGTTGC	TGA	GTTTTAGAGCTAGAAATAGCAAGTTAAAATAAGGCTAGTCCGTTATCAACTTGAAAAAGTGGCACCGAGTCGGTGCTTTT	CTAATACGACTCACTATAGAAGGGTTCGTTTTCAATGTTGC GTTTTAGAGCTAGAAATAGCAAGTT	AAAAAAGCACCGACTCGGTGCCAC	TCCCTGGCATTATTATACGGGTTAT	ACAAGTGGTGATTGCCATTGGAATT	528
	x3.7-p48-CTG	GGGGTTCGTTTTCAATGTTG	CTG	GTTTTAGAGCTAGAAATAGCAAGTTAAAATAAGGCTAGTCCGTTATCAACTTGAAAAAGTGGCACCGAGTCGGTGCTTTT	CTAATACGACTCACTATAGAAGGGGTTCGTTTTCAATGTTGGTTTTAGAGCTAGAAATAGCAAGTT	AAAAAAGCACCGACTCGGTGCCAC	TCCCTGGCATTATTATACGGGTTAT	ACAAGTGGTGATTGCCATTGGAATT	528
	x3.7-p48-TCG	GCCGGACTGCTTGGTACCAG	TCG	GTTTTAGAGCTAGAAATAGCAAGTTAAAATAAGGCTAGTCCGTTATCAACTTGAAAAAGTGGCACCGAGTCGGTGCTTTT	CTAATACGACTCACTATAGAAGCCGGACTGCTTGGTACCAGGTTTTAGAGCTAGAAATAGCAAGTT	AAAAAAGCACCGACTCGGTGCCAC	TCCCTGGCATTATTATACGGGTTAT	ACAAGTGGTGATTGCCATTGGAATT	528
	x3.7-ctcf-CCG	GGAAAGTGAAATGGCGGAAG	CCG	GTTTTAGAGCTAGAAATAGCAAGTTAAAATAAGGCTAGTCCGTTATCAACTTGAAAAAGTGGCACCGAGTCGGTGCTTTT	CTAATACGACTCACTATAGAAGGAAAGTGAAATGGCGGAAGGTTTTAGAGCTAGAAATAGCAAGTT	AAAAAAGCACCGACTCGGTGCCAC	TTTAAGGGAATGCTGGCAGGTATT	TTCTTGTTGTTGTAACTCTGCCTGT	767
	x3.7-ctcf-CGT	GAAAGTGAAATGGCGGAAGC	CGT	GTTTTAGAGCTAGAAATAGCAAGTTAAAATAAGGCTAGTCCGTTATCAACTTGAAAAAGTGGCACCGAGTCGGTGCTTTT	CTAATACGACTCACTATAGAAGAAAGTGAAATGGCGGAAGCGTTTTAGAGCTAGAAATAGCAAGTT	AAAAAAGCACCGACTCGGTGCCAC	TTTAAGGGAATGCTGGCAGGTATT	TTCTTGTTGTTGTAACTCTGCCTGT	767
	x3.7-ctcf-GGA	GAAGCCGTTGTGGAGGACTC	GGA	GTTTTAGAGCTAGAAATAGCAAGTTAAAATAAGGCTAGTCCGTTATCAACTTGAAAAAGTGGCACCGAGTCGGTGCTTTT	CTAATACGACTCACTATAGAAGAAGCCGTTGTGGAGGACTCGTTTTAGAGCTAGAAATAGCAAGTT	AAAAAAGCACCGACTCGGTGCCAC	TTTAAGGGAATGCTGGCAGGTATT	TTCTTGTTGTTGTAACTCTGCCTGT	767
	x3.7-ctcf-TAG	GAGGCGTAGGGAAGGTGGTG	TAG	GTTTTAGAGCTAGAAATAGCAAGTTAAAATAAGGCTAGTCCGTTATCAACTTGAAAAAGTGGCACCGAGTCGGTGCTTTT	CTAATACGACTCACTATAGAAGAGGCGTAGGGAAGGTGGTGGTTTTAGAGCTAGAAATAGCAAGTT	AAAAAAGCACCGACTCGGTGCCAC	TTTAAGGGAATGCTGGCAGGTATT	TTCTTGTTGTTGTAACTCTGCCTGT	767
	x3.7-ctcf-GAT	GGCGTAGGGAAGGTGGTGTA	GAT	GTTTTAGAGCTAGAAATAGCAAGTTAAAATAAGGCTAGTCCGTTATCAACTTGAAAAAGTGGCACCGAGTCGGTGCTTTT	CTAATACGACTCACTATAGAAGGCGTAGGGAAGGTGGTGTAGTTTTAGAGCTAGAAATAGCAAGTT	AAAAAAGCACCGACTCGGTGCCAC	TTTAAGGGAATGCTGGCAGGTATT	TTCTTGTTGTTGTAACTCTGCCTGT	767
	x3.7-ctcf-TGT	GGTGTAGATGAAGATAACTG	TGT	GTTTTAGAGCTAGAAATAGCAAGTTAAAATAAGGCTAGTCCGTTATCAACTTGAAAAAGTGGCACCGAGTCGGTGCTTTT	CTAATACGACTCACTATAGAAGGTGTAGATGAAGATAACTGGTTTTAGAGCTAGAAATAGCAAGTT	AAAAAAGCACCGACTCGGTGCCAC	TTTAAGGGAATGCTGGCAGGTATT	TTCTTGTTGTTGTAACTCTGCCTGT	767
	x3.7-ctcf-CAG	GAAGTACCTCATGATGTCAA	CAG	GTTTTAGAGCTAGAAATAGCAAGTTAAAATAAGGCTAGTCCGTTATCAACTTGAAAAAGTGGCACCGAGTCGGTGCTTTT	CTAATACGACTCACTATAGAAGAAGTACCTCATGATGTCAAGTTTTAGAGCTAGAAATAGCAAGTT	AAAAAAGCACCGACTCGGTGCCAC	TTTAAGGGAATGCTGGCAGGTATT	TTCTTGTTGTTGTAACTCTGCCTGT	767
	x3.7-ctcf-GGT	GTCAACAGTAATGTTCAGAT	GGT	GTTTTAGAGCTAGAAATAGCAAGTTAAAATAAGGCTAGTCCGTTATCAACTTGAAAAAGTGGCACCGAGTCGGTGCTTTT	CTAATACGACTCACTATAGAAGTCAACAGTAATGTTCAGATGTTTTAGAGCTAGAAATAGCAAGTT	AAAAAAGCACCGACTCGGTGCCAC	TTTAAGGGAATGCTGGCAGGTATT	TTCTTGTTGTTGTAACTCTGCCTGT	767
	x3.7-ctcf-ATG	GTAATGTTCAGATGGTGATG	ATG	GTTTTAGAGCTAGAAATAGCAAGTTAAAATAAGGCTAGTCCGTTATCAACTTGAAAAAGTGGCACCGAGTCGGTGCTTTT	CTAATACGACTCACTATAGAAGTAATGTTCAGATGGTGATGGTTTTAGAGCTAGAAATAGCAAGTT	AAAAAAGCACCGACTCGGTGCCAC	TTTAAGGGAATGCTGGCAGGTATT	TTCTTGTTGTTGTAACTCTGCCTGT	767
	x3.7-ctcf-CGA	GAAGGTGATCCTACTGTGGA	CGA	GTTTTAGAGCTAGAAATAGCAAGTTAAAATAAGGCTAGTCCGTTATCAACTTGAAAAAGTGGCACCGAGTCGGTGCTTTT	CTAATACGACTCACTATAGAAGAAGGTGATCCTACTGTGGAGTTTTAGAGCTAGAAATAGCAAGTT	AAAAAAGCACCGACTCGGTGCCAC	TTTAAGGGAATGCTGGCAGGTATT	TTCTTGTTGTTGTAACTCTGCCTGT	767
	x3.7-ctcf-AGC	GGTTGTCAATATGGAAGAGC	AGC	GTTTTAGAGCTAGAAATAGCAAGTTAAAATAAGGCTAGTCCGTTATCAACTTGAAAAAGTGGCACCGAGTCGGTGCTTTT	CTAATACGACTCACTATAGAAGGTTGTCAATATGGAAGAGCGTTTTAGAGCTAGAAATAGCAAGTT	AAAAAAGCACCGACTCGGTGCCAC	TTTAAGGGAATGCTGGCAGGTATT	TTCTTGTTGTTGTAACTCTGCCTGT	767
	x3.7-ctcf-AGT	GGAGAGCTTCAGCTTGTCCA	AGT	GTTTTAGAGCTAGAAATAGCAAGTTAAAATAAGGCTAGTCCGTTATCAACTTGAAAAAGTGGCACCGAGTCGGTGCTTTT	CTAATACGACTCACTATAGAAGGAGAGCTTCAGCTTGTCCAGTTTTAGAGCTAGAAATAGCAAGTT	AAAAAAGCACCGACTCGGTGCCAC	TTTAAGGGAATGCTGGCAGGTATT	TTCTTGTTGTTGTAACTCTGCCTGT	767
	x3.7-ctcf-GGC	GAAGCTCTCCAAGATTAATT	GGC	GTTTTAGAGCTAGAAATAGCAAGTTAAAATAAGGCTAGTCCGTTATCAACTTGAAAAAGTGGCACCGAGTCGGTGCTTTT	CTAATACGACTCACTATAGAAGAAGCTCTCCAAGATTAATTGTTTTAGAGCTAGAAATAGCAAGTT	AAAAAAGCACCGACTCGGTGCCAC	TTTAAGGGAATGCTGGCAGGTATT	TTCTTGTTGTTGTAACTCTGCCTGT	767
	x3.7-ctcf-AGA	GTTTTGGCCAGGTGTGAAGA	AGA	GTTTTAGAGCTAGAAATAGCAAGTTAAAATAAGGCTAGTCCGTTATCAACTTGAAAAAGTGGCACCGAGTCGGTGCTTTT	CTAATACGACTCACTATAGAAGTTTTGGCCAGGTGTGAAGAGTTTTAGAGCTAGAAATAGCAAGTT	AAAAAAGCACCGACTCGGTGCCAC	AGAAATCGGTTTGGTAAGTGTGGTA	TAAGGGTAAAGTGCACCTGGGTAAC	549
	x3.7-ctcf-GTG	GGTTAGAACGTCTTGGACAG	GTG	GTTTTAGAGCTAGAAATAGCAAGTTAAAATAAGGCTAGTCCGTTATCAACTTGAAAAAGTGGCACCGAGTCGGTGCTTTT	CTAATACGACTCACTATAGAAGGTTAGAACGTCTTGGACAGGTTTTAGAGCTAGAAATAGCAAGTT	AAAAAAGCACCGACTCGGTGCCAC	AGAAATCGGTTTGGTAAGTGTGGTA	TAAGGGTAAAGTGCACCTGGGTAAC	549
	x3.7-ctcf-GCG	GCCACACAAGTGCCACCTAT	GCG	GTTTTAGAGCTAGAAATAGCAAGTTAAAATAAGGCTAGTCCGTTATCAACTTGAAAAAGTGGCACCGAGTCGGTGCTTTT	CTAATACGACTCACTATAGAAGCCACACAAGTGCCACCTATGTTTTAGAGCTAGAAATAGCAAGTT	AAAAAAGCACCGACTCGGTGCCAC	AGAAATCGGTTTGGTAAGTGTGGTA	TAAGGGTAAAGTGCACCTGGGTAAC	549
	x3.7-ctcf-TGC	GGCTTTCAGGACTGTTACTT	TGC	GTTTTAGAGCTAGAAATAGCAAGTTAAAATAAGGCTAGTCCGTTATCAACTTGAAAAAGTGGCACCGAGTCGGTGCTTTT	CTAATACGACTCACTATAGAAGGCTTTCAGGACTGTTACTTGTTTTAGAGCTAGAAATAGCAAGTT	AAAAAAGCACCGACTCGGTGCCAC	AGAAATCGGTTTGGTAAGTGTGGTA	TAAGGGTAAAGTGCACCTGGGTAAC	549
	x3.7-ctcf-TCG	GAATGCTACATTTGCCATGC	TCG	GTTTTAGAGCTAGAAATAGCAAGTTAAAATAAGGCTAGTCCGTTATCAACTTGAAAAAGTGGCACCGAGTCGGTGCTTTT	CTAATACGACTCACTATAGAAGAATGCTACATTTGCCATGCGTTTTAGAGCTAGAAATAGCAAGTT	AAAAAAGCACCGACTCGGTGCCAC	ATATTCGATCCCATACTGGAGAACG	AAGCAAGAAAAATGTTCCTGGGTTA	599
	x3.7-ctcf-CTG	GCCACGTTTTCAGTGTGTTT	CTG	GTTTTAGAGCTAGAAATAGCAAGTTAAAATAAGGCTAGTCCGTTATCAACTTGAAAAAGTGGCACCGAGTCGGTGCTTTT	CTAATACGACTCACTATAGAAGCCACGTTTTCAGTGTGTTTGTTTTAGAGCTAGAAATAGCAAGTT	AAAAAAGCACCGACTCGGTGCCAC	ATATTCGATCCCATACTGGAGAACG	AAGCAAGAAAAATGTTCCTGGGTTA	599
	x3.7-ctcf-ACG	GGGGACAATGAAATTTGGCC	ACG	GTTTTAGAGCTAGAAATAGCAAGTTAAAATAAGGCTAGTCCGTTATCAACTTGAAAAAGTGGCACCGAGTCGGTGCTTTT	CTAATACGACTCACTATAGAAGGGGACAATGAAATTTGGCCGTTTTAGAGCTAGAAATAGCAAGTT	AAAAAAGCACCGACTCGGTGCCAC	ATATTCGATCCCATACTGGAGAACG	AAGCAAGAAAAATGTTCCTGGGTTA	599
	x3.7-ctcf-AAG	GTGACACAGTAATTGCAAGG	AAG	GTTTTAGAGCTAGAAATAGCAAGTTAAAATAAGGCTAGTCCGTTATCAACTTGAAAAAGTGGCACCGAGTCGGTGCTTTT	CTAATACGACTCACTATAGAAGTGACACAGTAATTGCAAGGGTTTTAGAGCTAGAAATAGCAAGTT	AAAAAAGCACCGACTCGGTGCCAC	ATATTCGATCCCATACTGGAGAACG	AAGCAAGAAAAATGTTCCTGGGTTA	599
	x3.7-ctcf-GAG	GACACAGTAATTGCAAGGAA	GAG	GTTTTAGAGCTAGAAATAGCAAGTTAAAATAAGGCTAGTCCGTTATCAACTTGAAAAAGTGGCACCGAGTCGGTGCTTTT	CTAATACGACTCACTATAGAAGACACAGTAATTGCAAGGAAGTTTTAGAGCTAGAAATAGCAAGTT	AAAAAAGCACCGACTCGGTGCCAC	ATATTCGATCCCATACTGGAGAACG	AAGCAAGAAAAATGTTCCTGGGTTA	599
	x3.7-ctcf-TTG	GCGAAAGCAACATTCCTACA	TTG	GTTTTAGAGCTAGAAATAGCAAGTTAAAATAAGGCTAGTCCGTTATCAACTTGAAAAAGTGGCACCGAGTCGGTGCTTTT	CTAATACGACTCACTATAGAAGCGAAAGCAACATTCCTACAGTTTTAGAGCTAGAAATAGCAAGTT	AAAAAAGCACCGACTCGGTGCCAC	TCTTATTTCACAGCCTAACTGGGTA	TTCATTCTGTCAAACTCTTTTCGTT	535
	x3.7-ctcf-TGA	GGAAAGAAGTGTCGCTACTG	TGA	GTTTTAGAGCTAGAAATAGCAAGTTAAAATAAGGCTAGTCCGTTATCAACTTGAAAAAGTGGCACCGAGTCGGTGCTTTT	CTAATACGACTCACTATAGAAGGAAAGAAGTGTCGCTACTGGTTTTAGAGCTAGAAATAGCAAGTT	AAAAAAGCACCGACTCGGTGCCAC	TCTTATTTCACAGCCTAACTGGGTA	TTCATTCTGTCAAACTCTTTTCGTT	535
	x3.7-ctcf-CGC	GGTGCTGGATTAGTGCATAA	CGC	GTTTTAGAGCTAGAAATAGCAAGTTAAAATAAGGCTAGTCCGTTATCAACTTGAAAAAGTGGCACCGAGTCGGTGCTTTT	CTAATACGACTCACTATAGAAGGTGCTGGATTAGTGCATAAGTTTTAGAGCTAGAAATAGCAAGTT	AAAAAAGCACCGACTCGGTGCCAC	TCTTATTTCACAGCCTAACTGGGTA	TTCATTCTGTCAAACTCTTTTCGTT	535
	x3.7-ctcf-GAA	GATTTAAATGTGACCAGTGT	GAA	GTTTTAGAGCTAGAAATAGCAAGTTAAAATAAGGCTAGTCCGTTATCAACTTGAAAAAGTGGCACCGAGTCGGTGCTTTT	CTAATACGACTCACTATAGAAGATTTAAATGTGACCAGTGTGTTTTAGAGCTAGAAATAGCAAGTT	AAAAAAGCACCGACTCGGTGCCAC	TCTTATTTCACAGCCTAACTGGGTA	TTCATTCTGTCAAACTCTTTTCGTT	535
	x3.7-apc-TGA	GGGGTTATAGTTAAAGGGTG	TGA	GTTTTAGAGCTAGAAATAGCAAGTTAAAATAAGGCTAGTCCGTTATCAACTTGAAAAAGTGGCACCGAGTCGGTGCTTTT	CTAATACGACTCACTATAGAAGGGGTTATAGTTAAAGGGTGGTTTTAGAGCTAGAAATAGCAAGTT	AAAAAAGCACCGACTCGGTGCCAC	TAAAACCGAGGATGTATGGGTAAGG	GCCAGTGTTTTAAGGATTTTGTTGG	746
	x3.7-apc-AGC	GTCAGTTCCCTTTGTATCTG	AGC	GTTTTAGAGCTAGAAATAGCAAGTTAAAATAAGGCTAGTCCGTTATCAACTTGAAAAAGTGGCACCGAGTCGGTGCTTTT	CTAATACGACTCACTATAGAAGTCAGTTCCCTTTGTATCTGGTTTTAGAGCTAGAAATAGCAAGTT	AAAAAAGCACCGACTCGGTGCCAC	TAAAACCGAGGATGTATGGGTAAGG	GCCAGTGTTTTAAGGATTTTGTTGG	746
	x3.7-apc-CCG	GGCCCCTGCTGTTTCTAAAA	CCG	GTTTTAGAGCTAGAAATAGCAAGTTAAAATAAGGCTAGTCCGTTATCAACTTGAAAAAGTGGCACCGAGTCGGTGCTTTT	CTAATACGACTCACTATAGAAGGCCCCTGCTGTTTCTAAAAGTTTTAGAGCTAGAAATAGCAAGTT	AAAAAAGCACCGACTCGGTGCCAC	ACATTCAGAGTCTCCATCCAGGCT	TTGTCTCTTGCTGGTTGTTTATTAGA	638
	x3.7-apc-TTG	GGTCCGAGAAAGGAACAAAC	TTG	GTTTTAGAGCTAGAAATAGCAAGTTAAAATAAGGCTAGTCCGTTATCAACTTGAAAAAGTGGCACCGAGTCGGTGCTTTT	CTAATACGACTCACTATAGAAGGTCCGAGAAAGGAACAAACGTTTTAGAGCTAGAAATAGCAAGTT	AAAAAAGCACCGACTCGGTGCCAC	ACATTCAGAGTCTCCATCCAGGCT	TTGTCTCTTGCTGGTTGTTTATTAGA	638
	x3.7-apc-GAT	GCACTCCATTCAAGCTGGGG	GAT	GTTTTAGAGCTAGAAATAGCAAGTTAAAATAAGGCTAGTCCGTTATCAACTTGAAAAAGTGGCACCGAGTCGGTGCTTTT	CTAATACGACTCACTATAGAAGCACTCCATTCAAGCTGGGGGTTTTAGAGCTAGAAATAGCAAGTT	AAAAAAGCACCGACTCGGTGCCAC	CCAAAACGCCTAGCAGTATACCTC	GAATGGATGATGAACTTCCAGTTCT	555
	x3.7-apc-CGA	GAAATGCACTGCATGTCAGA	CGA	GTTTTAGAGCTAGAAATAGCAAGTTAAAATAAGGCTAGTCCGTTATCAACTTGAAAAAGTGGCACCGAGTCGGTGCTTTT	CTAATACGACTCACTATAGAAGAAATGCACTGCATGTCAGAGTTTTAGAGCTAGAAATAGCAAGTT	AAAAAAGCACCGACTCGGTGCCAC	ATTTAAGCCCCAAAACCACCCAC	CCATACCCATCTGTGCTGCTGAC	583
	x3.7-apc-GAG	GTTACCTTCCATAGTTGGTC	GAG	GTTTTAGAGCTAGAAATAGCAAGTTAAAATAAGGCTAGTCCGTTATCAACTTGAAAAAGTGGCACCGAGTCGGTGCTTTT	CTAATACGACTCACTATAGAAGTTACCTTCCATAGTTGGTCGTTTTAGAGCTAGAAATAGCAAGTT	AAAAAAGCACCGACTCGGTGCCAC	ATTTAAGCCCCAAAACCACCCAC	CCATACCCATCTGTGCTGCTGAC	583
	x3.7-apc-GGA	GATGGCACACTTGAGCCAGG	GGA	GTTTTAGAGCTAGAAATAGCAAGTTAAAATAAGGCTAGTCCGTTATCAACTTGAAAAAGTGGCACCGAGTCGGTGCTTTT	CTAATACGACTCACTATAGAAGATGGCACACTTGAGCCAGGGTTTTAGAGCTAGAAATAGCAAGTT	AAAAAAGCACCGACTCGGTGCCAC	GTTTCTAGATTATATGTACTTGGCATTAT	GCCTGCTTGAATCCAGAACATACT	590
	x3.7-apc-TCG	GCCTCTTGGTCTTTTGCATT	TCG	GTTTTAGAGCTAGAAATAGCAAGTTAAAATAAGGCTAGTCCGTTATCAACTTGAAAAAGTGGCACCGAGTCGGTGCTTTT	CTAATACGACTCACTATAGAAGCCTCTTGGTCTTTTGCATTGTTTTAGAGCTAGAAATAGCAAGTT	AAAAAAGCACCGACTCGGTGCCAC	GTTTCTAGATTATATGTACTTGGCATTAT	GCCTGCTTGAATCCAGAACATACT	590
	x3.7-apc-AGA	GCACGAAATGCAAAAGACCA	AGA	GTTTTAGAGCTAGAAATAGCAAGTTAAAATAAGGCTAGTCCGTTATCAACTTGAAAAAGTGGCACCGAGTCGGTGCTTTT	CTAATACGACTCACTATAGAAGCACGAAATGCAAAAGACCAGTTTTAGAGCTAGAAATAGCAAGTT	AAAAAAGCACCGACTCGGTGCCAC	GTTTCTAGATTATATGTACTTGGCATTAT	GCCTGCTTGAATCCAGAACATACT	590
	x3.7-apc-GTG	GGCCATCATTGAGAGTGGAG	GTG	GTTTTAGAGCTAGAAATAGCAAGTTAAAATAAGGCTAGTCCGTTATCAACTTGAAAAAGTGGCACCGAGTCGGTGCTTTT	CTAATACGACTCACTATAGAAGGCCATCATTGAGAGTGGAGGTTTTAGAGCTAGAAATAGCAAGTT	AAAAAAGCACCGACTCGGTGCCAC	TATGGAATGTGCTCTGGATGTTAAG	CAAAATAATGCCAAGTACATATAATCT	607
	x3.7-apc-GCG	GCTCTGTTGATGGGGCATTG	GCG	GTTTTAGAGCTAGAAATAGCAAGTTAAAATAAGGCTAGTCCGTTATCAACTTGAAAAAGTGGCACCGAGTCGGTGCTTTT	CTAATACGACTCACTATAGAAGCTCTGTTGATGGGGCATTGGTTTTAGAGCTAGAAATAGCAAGTT	AAAAAAGCACCGACTCGGTGCCAC	TATGGAATGTGCTCTGGATGTTAAG	CAAAATAATGCCAAGTACATATAATCT	607
	x3.7-apc-CGT	GATCCGAGCTTACTGTGAAA	CGT	GTTTTAGAGCTAGAAATAGCAAGTTAAAATAAGGCTAGTCCGTTATCAACTTGAAAAAGTGGCACCGAGTCGGTGCTTTT	CTAATACGACTCACTATAGAAGATCCGAGCTTACTGTGAAAGTTTTAGAGCTAGAAATAGCAAGTT	AAAAAAGCACCGACTCGGTGCCAC	ATATATGTGGCACTAAAATGGTCAAA	CAATAGGGATTTTGGATGGTAAGC	672
	x3.7-apc-ACG	GCACGGGCCTCTTTGCTTCC	ACG	GTTTTAGAGCTAGAAATAGCAAGTTAAAATAAGGCTAGTCCGTTATCAACTTGAAAAAGTGGCACCGAGTCGGTGCTTTT	CTAATACGACTCACTATAGAAGCACGGGCCTCTTTGCTTCCGTTTTAGAGCTAGAAATAGCAAGTT	AAAAAAGCACCGACTCGGTGCCAC	ATATATGTGGCACTAAAATGGTCAAA	CAATAGGGATTTTGGATGGTAAGC	672
	x3.7-apc-AAG	GCTATTGCATGGCAATGATA	AAG	GTTTTAGAGCTAGAAATAGCAAGTTAAAATAAGGCTAGTCCGTTATCAACTTGAAAAAGTGGCACCGAGTCGGTGCTTTT	CTAATACGACTCACTATAGAAGCTATTGCATGGCAATGATAGTTTTAGAGCTAGAAATAGCAAGTT	AAAAAAGCACCGACTCGGTGCCAC	ATATATGTGGCACTAAAATGGTCAAA	CAATAGGGATTTTGGATGGTAAGC	672
	x3.7-apc-CGC	GAGGAAGACACCCAGACTGG	CGC	GTTTTAGAGCTAGAAATAGCAAGTTAAAATAAGGCTAGTCCGTTATCAACTTGAAAAAGTGGCACCGAGTCGGTGCTTTT	CTAATACGACTCACTATAGAAGAGGAAGACACCCAGACTGGGTTTTAGAGCTAGAAATAGCAAGTT	AAAAAAGCACCGACTCGGTGCCAC	ATATATGTGGCACTAAAATGGTCAAA	CAATAGGGATTTTGGATGGTAAGC	672
	x3.7-apc-GGT	GTCTATAAACAGGTGGAAAT	GGT	GTTTTAGAGCTAGAAATAGCAAGTTAAAATAAGGCTAGTCCGTTATCAACTTGAAAAAGTGGCACCGAGTCGGTGCTTTT	CTAATACGACTCACTATAGAAGTCTATAAACAGGTGGAAATGTTTTAGAGCTAGAAATAGCAAGTT	AAAAAAGCACCGACTCGGTGCCAC	ATATATGTGGCACTAAAATGGTCAAA	CAATAGGGATTTTGGATGGTAAGC	672
	x3.7-apc-TGT	GATGCCTCACTCTCTAGTTT	TGT	GTTTTAGAGCTAGAAATAGCAAGTTAAAATAAGGCTAGTCCGTTATCAACTTGAAAAAGTGGCACCGAGTCGGTGCTTTT	CTAATACGACTCACTATAGAAGATGCCTCACTCTCTAGTTTGTTTTAGAGCTAGAAATAGCAAGTT	AAAAAAGCACCGACTCGGTGCCAC	GCTTAACACAAGGGGTGAACCATA	CAGAGGTTATGATACCTGCTCAAAA	541
	x3.7-apc-AGT	GGTTTGTATTCTCCATCTTC	AGT	GTTTTAGAGCTAGAAATAGCAAGTTAAAATAAGGCTAGTCCGTTATCAACTTGAAAAAGTGGCACCGAGTCGGTGCTTTT	CTAATACGACTCACTATAGAAGGTTTGTATTCTCCATCTTCGTTTTAGAGCTAGAAATAGCAAGTT	AAAAAAGCACCGACTCGGTGCCAC	GCTTAACACAAGGGGTGAACCATA	CAGAGGTTATGATACCTGCTCAAAA	541
	x3.7-apc-CTG	GCCGCCACTTGCTTTAACAA	CTG	GTTTTAGAGCTAGAAATAGCAAGTTAAAATAAGGCTAGTCCGTTATCAACTTGAAAAAGTGGCACCGAGTCGGTGCTTTT	CTAATACGACTCACTATAGAAGCCGCCACTTGCTTTAACAAGTTTTAGAGCTAGAAATAGCAAGTT	AAAAAAGCACCGACTCGGTGCCAC	GCTTAACACAAGGGGTGAACCATA	CAGAGGTTATGATACCTGCTCAAAA	541
	x3.7-apc-ATG	GGTCATACGAAGCAGCAGCC	ATG	GTTTTAGAGCTAGAAATAGCAAGTTAAAATAAGGCTAGTCCGTTATCAACTTGAAAAAGTGGCACCGAGTCGGTGCTTTT	CTAATACGACTCACTATAGAAGGTCATACGAAGCAGCAGCCGTTTTAGAGCTAGAAATAGCAAGTT	AAAAAAGCACCGACTCGGTGCCAC	GCTTAACACAAGGGGTGAACCATA	CAGAGGTTATGATACCTGCTCAAAA	541
	x3.7-kcnj2-TGC	GGTAACGCAAAATTCTAACT	TGC	GTTTTAGAGCTAGAAATAGCAAGTTAAAATAAGGCTAGTCCGTTATCAACTTGAAAAAGTGGCACCGAGTCGGTGCTTTT	CTAATACGACTCACTATAGAAGGTAACGCAAAATTCTAACTGTTTTAGAGCTAGAAATAGCAAGTT	AAAAAAGCACCGACTCGGTGCCAC	AGCACTTTTGAACTGGAATGATTGA	TGAGGTCTATAGGTTAGCAAGTGGAT	450
	x3.7-kcnj2-ACG	GAGTATTTATGGGAGTATGT	ACG	GTTTTAGAGCTAGAAATAGCAAGTTAAAATAAGGCTAGTCCGTTATCAACTTGAAAAAGTGGCACCGAGTCGGTGCTTTT	CTAATACGACTCACTATAGAAGAGTATTTATGGGAGTATGTGTTTTAGAGCTAGAAATAGCAAGTT	AAAAAAGCACCGACTCGGTGCCAC	GCTTTTCAGAATCAATCTCAAGACTC	AAAGACCGTTCATTAGGACAAGATT	712
	x3.7-kcnj2-GAT	GGAGAGGCAAATGGTGGATT	GAT	GTTTTAGAGCTAGAAATAGCAAGTTAAAATAAGGCTAGTCCGTTATCAACTTGAAAAAGTGGCACCGAGTCGGTGCTTTT	CTAATACGACTCACTATAGAAGGAGAGGCAAATGGTGGATTGTTTTAGAGCTAGAAATAGCAAGTT	AAAAAAGCACCGACTCGGTGCCAC	GCTTTTCAGAATCAATCTCAAGACTC	AAAGACCGTTCATTAGGACAAGATT	712
	x3.7-kcnj2-AAG	GGAAGCCAAGGATGGCAGAA	AAG	GTTTTAGAGCTAGAAATAGCAAGTTAAAATAAGGCTAGTCCGTTATCAACTTGAAAAAGTGGCACCGAGTCGGTGCTTTT	CTAATACGACTCACTATAGAAGGAAGCCAAGGATGGCAGAAGTTTTAGAGCTAGAAATAGCAAGTT	AAAAAAGCACCGACTCGGTGCCAC	CTACCTGGCGAGCGAAATCTTAT	TTTAGTGCTTTAACTTTCCATCTGATC	679
	x3.7-kcnj2-CCG	GGGTTTTTAAAGAAAATCAG	CCG	GTTTTAGAGCTAGAAATAGCAAGTTAAAATAAGGCTAGTCCGTTATCAACTTGAAAAAGTGGCACCGAGTCGGTGCTTTT	CTAATACGACTCACTATAGAAGGGTTTTTAAAGAAAATCAGGTTTTAGAGCTAGAAATAGCAAGTT	AAAAAAGCACCGACTCGGTGCCAC	CTACCTGGCGAGCGAAATCTTAT	TTTAGTGCTTTAACTTTCCATCTGATC	679
	x3.7-kcnj2-GCG	GGTTCAAGAGGAACCTGGTT	GCG	GTTTTAGAGCTAGAAATAGCAAGTTAAAATAAGGCTAGTCCGTTATCAACTTGAAAAAGTGGCACCGAGTCGGTGCTTTT	CTAATACGACTCACTATAGAAGGTTCAAGAGGAACCTGGTTGTTTTAGAGCTAGAAATAGCAAGTT	AAAAAAGCACCGACTCGGTGCCAC	CTACCTGGCGAGCGAAATCTTAT	TTTAGTGCTTTAACTTTCCATCTGATC	679
	x3.7-kcnj2-GGA	GGTTGCGATGGTCCATTTCA	GGA	GTTTTAGAGCTAGAAATAGCAAGTTAAAATAAGGCTAGTCCGTTATCAACTTGAAAAAGTGGCACCGAGTCGGTGCTTTT	CTAATACGACTCACTATAGAAGGTTGCGATGGTCCATTTCAGTTTTAGAGCTAGAAATAGCAAGTT	AAAAAAGCACCGACTCGGTGCCAC	CTACCTGGCGAGCGAAATCTTAT	TTTAGTGCTTTAACTTTCCATCTGATC	679
	x3.7-kcnj2-AGC	GTGACAATGGGGTTCCCGAC	AGC	GTTTTAGAGCTAGAAATAGCAAGTTAAAATAAGGCTAGTCCGTTATCAACTTGAAAAAGTGGCACCGAGTCGGTGCTTTT	CTAATACGACTCACTATAGAAGTGACAATGGGGTTCCCGACGTTTTAGAGCTAGAAATAGCAAGTT	AAAAAAGCACCGACTCGGTGCCAC	CTACCTGGCGAGCGAAATCTTAT	TTTAGTGCTTTAACTTTCCATCTGATC	679
	x3.7-kcnj2-TGA	GCCTTCCTCCTCTTTGCTTG	TGA	GTTTTAGAGCTAGAAATAGCAAGTTAAAATAAGGCTAGTCCGTTATCAACTTGAAAAAGTGGCACCGAGTCGGTGCTTTT	CTAATACGACTCACTATAGAAGCCTTCCTCCTCTTTGCTTGGTTTTAGAGCTAGAAATAGCAAGTT	AAAAAAGCACCGACTCGGTGCCAC	CTACCTGGCGAGCGAAATCTTAT	TTTAGTGCTTTAACTTTCCATCTGATC	679
	x3.7-kcnj2-GAA	GGAGCTCCTACCTGGCGAGC	GAA	GTTTTAGAGCTAGAAATAGCAAGTTAAAATAAGGCTAGTCCGTTATCAACTTGAAAAAGTGGCACCGAGTCGGTGCTTTT	CTAATACGACTCACTATAGAAGGAGCTCCTACCTGGCGAGCGTTTTAGAGCTAGAAATAGCAAGTT	AAAAAAGCACCGACTCGGTGCCAC	AAGTTGTGCTTGATGTGGCGAGTAG	TCAGCTAAGTCCCTGGCACAACAA	470
	x3.7-kcnj2-GGT	GTTGTGATACTGGAAGGCAT	GGT	GTTTTAGAGCTAGAAATAGCAAGTTAAAATAAGGCTAGTCCGTTATCAACTTGAAAAAGTGGCACCGAGTCGGTGCTTTT	CTAATACGACTCACTATAGAAGTTGTGATACTGGAAGGCATGTTTTAGAGCTAGAAATAGCAAGTT	AAAAAAGCACCGACTCGGTGCCAC	AAGTTGTGCTTGATGTGGCGAGTAG	TCAGCTAAGTCCCTGGCACAACAA	470
	x3.7-kcnj2-TAG	GGACAATTCTGACTTTGAAA	TAG	GTTTTAGAGCTAGAAATAGCAAGTTAAAATAAGGCTAGTCCGTTATCAACTTGAAAAAGTGGCACCGAGTCGGTGCTTTT	CTAATACGACTCACTATAGAAGGACAATTCTGACTTTGAAAGTTTTAGAGCTAGAAATAGCAAGTT	AAAAAAGCACCGACTCGGTGCCAC	AAGTTGTGCTTGATGTGGCGAGTAG	TCAGCTAAGTCCCTGGCACAACAA	470
	x3.7-kcnj2-AGA	GTTTTGATAGTGGAATAGAC	AGA	GTTTTAGAGCTAGAAATAGCAAGTTAAAATAAGGCTAGTCCGTTATCAACTTGAAAAAGTGGCACCGAGTCGGTGCTTTT	CTAATACGACTCACTATAGAAGTTTTGATAGTGGAATAGACGTTTTAGAGCTAGAAATAGCAAGTT	AAAAAAGCACCGACTCGGTGCCAC	AAGTTGTGCTTGATGTGGCGAGTAG	TCAGCTAAGTCCCTGGCACAACAA	470
	x3.7-kcnj2-CAG	GCCCTCACGTGAGCTTCAAC	CAG	GTTTTAGAGCTAGAAATAGCAAGTTAAAATAAGGCTAGTCCGTTATCAACTTGAAAAAGTGGCACCGAGTCGGTGCTTTT	CTAATACGACTCACTATAGAAGCCCTCACGTGAGCTTCAACGTTTTAGAGCTAGAAATAGCAAGTT	AAAAAAGCACCGACTCGGTGCCAC	AACAGTGTCGGAGTCGGTTTGT	TCCAAGTCTTGTTTGCTAAGATCAT	742
	x3.7-kcnj2-GAG	GAAGTTGTGCTTGATGTGGC	GAG	GTTTTAGAGCTAGAAATAGCAAGTTAAAATAAGGCTAGTCCGTTATCAACTTGAAAAAGTGGCACCGAGTCGGTGCTTTT	CTAATACGACTCACTATAGAAGAAGTTGTGCTTGATGTGGCGTTTTAGAGCTAGAAATAGCAAGTT	AAAAAAGCACCGACTCGGTGCCAC	AACAGTGTCGGAGTCGGTTTGT	TCCAAGTCTTGTTTGCTAAGATCAT	742
	x3.7-kcnj2-TTG	GCACCGGAAACCATAGCCAA	TTG	GTTTTAGAGCTAGAAATAGCAAGTTAAAATAAGGCTAGTCCGTTATCAACTTGAAAAAGTGGCACCGAGTCGGTGCTTTT	CTAATACGACTCACTATAGAAGCACCGGAAACCATAGCCAAGTTTTAGAGCTAGAAATAGCAAGTT	AAAAAAGCACCGACTCGGTGCCAC	AACAGTGTCGGAGTCGGTTTGT	TCCAAGTCTTGTTTGCTAAGATCAT	742
	x3.7-kcnj2-TGT	GACTTGGGTGACACATGGCT	TGT	GTTTTAGAGCTAGAAATAGCAAGTTAAAATAAGGCTAGTCCGTTATCAACTTGAAAAAGTGGCACCGAGTCGGTGCTTTT	CTAATACGACTCACTATAGAAGACTTGGGTGACACATGGCTGTTTTAGAGCTAGAAATAGCAAGTT	AAAAAAGCACCGACTCGGTGCCAC	AACAGTGTCGGAGTCGGTTTGT	TCCAAGTCTTGTTTGCTAAGATCAT	742
	x3.7-kcnj2-GTG	GCCAACGAATGTCCACACAT	GTG	GTTTTAGAGCTAGAAATAGCAAGTTAAAATAAGGCTAGTCCGTTATCAACTTGAAAAAGTGGCACCGAGTCGGTGCTTTT	CTAATACGACTCACTATAGAAGCCAACGAATGTCCACACATGTTTTAGAGCTAGAAATAGCAAGTT	AAAAAAGCACCGACTCGGTGCCAC	AACAGTGTCGGAGTCGGTTTGT	TCCAAGTCTTGTTTGCTAAGATCAT	742
	x3.7-kcnj2-ATG	GGCCACAATGGCAGTTGCTA	ATG	GTTTTAGAGCTAGAAATAGCAAGTTAAAATAAGGCTAGTCCGTTATCAACTTGAAAAAGTGGCACCGAGTCGGTGCTTTT	CTAATACGACTCACTATAGAAGGCCACAATGGCAGTTGCTAGTTTTAGAGCTAGAAATAGCAAGTT	AAAAAAGCACCGACTCGGTGCCAC	CTGGTTTATTACTGCTGAAGGGGCT	TGGGGCACCTAAGTCTTCGTGTAG	792
	x3.7-kcnj2-CGT	GTGCGAACCAACCGTTACAG	CGT	GTTTTAGAGCTAGAAATAGCAAGTTAAAATAAGGCTAGTCCGTTATCAACTTGAAAAAGTGGCACCGAGTCGGTGCTTTT	CTAATACGACTCACTATAGAAGTGCGAACCAACCGTTACAGGTTTTAGAGCTAGAAATAGCAAGTT	AAAAAAGCACCGACTCGGTGCCAC	CTGGTTTATTACTGCTGAAGGGGCT	TGGGGCACCTAAGTCTTCGTGTAG	792
	x3.7-kcnj2-CGC	GCTGTAACGGTTGGTTCGCA	CGC	GTTTTAGAGCTAGAAATAGCAAGTTAAAATAAGGCTAGTCCGTTATCAACTTGAAAAAGTGGCACCGAGTCGGTGCTTTT	CTAATACGACTCACTATAGAAGCTGTAACGGTTGGTTCGCAGTTTTAGAGCTAGAAATAGCAAGTT	AAAAAAGCACCGACTCGGTGCCAC	CTGGTTTATTACTGCTGAAGGGGCT	TGGGGCACCTAAGTCTTCGTGTAG	792
	x3.7-kcnj2-CGA	GTGAAGTGATGGGCAGCGTG	CGA	GTTTTAGAGCTAGAAATAGCAAGTTAAAATAAGGCTAGTCCGTTATCAACTTGAAAAAGTGGCACCGAGTCGGTGCTTTT	CTAATACGACTCACTATAGAAGTGAAGTGATGGGCAGCGTGGTTTTAGAGCTAGAAATAGCAAGTT	AAAAAAGCACCGACTCGGTGCCAC	CTGGTTTATTACTGCTGAAGGGGCT	TGGGGCACCTAAGTCTTCGTGTAG	792
	x3.7-kcnj2-TCG	GCAGCTTTCGTAACAGAATC	TCG	GTTTTAGAGCTAGAAATAGCAAGTTAAAATAAGGCTAGTCCGTTATCAACTTGAAAAAGTGGCACCGAGTCGGTGCTTTT	CTAATACGACTCACTATAGAAGCAGCTTTCGTAACAGAATCGTTTTAGAGCTAGAAATAGCAAGTT	AAAAAAGCACCGACTCGGTGCCAC	CTGGTTTATTACTGCTGAAGGGGCT	TGGGGCACCTAAGTCTTCGTGTAG	792
	x3.7-kcnj2-AGT	GATTTTCCATACCTTAAGGG	AGT	GTTTTAGAGCTAGAAATAGCAAGTTAAAATAAGGCTAGTCCGTTATCAACTTGAAAAAGTGGCACCGAGTCGGTGCTTTT	CTAATACGACTCACTATAGAAGATTTTCCATACCTTAAGGGGTTTTAGAGCTAGAAATAGCAAGTT	AAAAAAGCACCGACTCGGTGCCAC	ACTACTGGAGTGTTATGGAGGTTCA	CAAGTGATGCGATATGTATTGTAGG	479
	x3.7-bmp4-TGA	GGTGTGGGTGCCGTTAAGTC	TGA	GTTTTAGAGCTAGAAATAGCAAGTTAAAATAAGGCTAGTCCGTTATCAACTTGAAAAAGTGGCACCGAGTCGGTGCTTTT	CTAATACGACTCACTATAGAAGGTGTGGGTGCCGTTAAGTCGTTTTAGAGCTAGAAATAGCAAGTT	AAAAAAGCACCGACTCGGTGCCAC	CTCTTTATGTGGATTTCAGCGATGT	TGACAGACTTTAGCATAACAACATAGG	787
	x3.7-bmp4-CCG	GTGGTGGAAGGGTGTGGGTG	CCG	GTTTTAGAGCTAGAAATAGCAAGTTAAAATAAGGCTAGTCCGTTATCAACTTGAAAAAGTGGCACCGAGTCGGTGCTTTT	CTAATACGACTCACTATAGAAGTGGTGGAAGGGTGTGGGTGGTTTTAGAGCTAGAAATAGCAAGTT	AAAAAAGCACCGACTCGGTGCCAC	CTCTTTATGTGGATTTCAGCGATGT	TGACAGACTTTAGCATAACAACATAGG	787
	x3.7-bmp4-GAG	GTACAATAGCATGGTTAGTT	GAG	GTTTTAGAGCTAGAAATAGCAAGTTAAAATAAGGCTAGTCCGTTATCAACTTGAAAAAGTGGCACCGAGTCGGTGCTTTT	CTAATACGACTCACTATAGAAGTACAATAGCATGGTTAGTTGTTTTAGAGCTAGAAATAGCAAGTT	AAAAAAGCACCGACTCGGTGCCAC	CTCTTTATGTGGATTTCAGCGATGT	TGACAGACTTTAGCATAACAACATAGG	787
	x3.7-bmp4-CGT	GTCCAAAACAGCAAAGACCC	CGT	GTTTTAGAGCTAGAAATAGCAAGTTAAAATAAGGCTAGTCCGTTATCAACTTGAAAAAGTGGCACCGAGTCGGTGCTTTT	CTAATACGACTCACTATAGAAGTCCAAAACAGCAAAGACCCGTTTTAGAGCTAGAAATAGCAAGTT	AAAAAAGCACCGACTCGGTGCCAC	ATTTGTTTAGTCATATGCAGTCGTCTC	CAGCCAAGGGAAATGGACAATCT	786
	x3.7-bmp4-TCG	GGGAAGCATGTAAGGATAAG	TCG	GTTTTAGAGCTAGAAATAGCAAGTTAAAATAAGGCTAGTCCGTTATCAACTTGAAAAAGTGGCACCGAGTCGGTGCTTTT	CTAATACGACTCACTATAGAAGGGAAGCATGTAAGGATAAGGTTTTAGAGCTAGAAATAGCAAGTT	AAAAAAGCACCGACTCGGTGCCAC	ATTTGTTTAGTCATATGCAGTCGTCTC	CAGCCAAGGGAAATGGACAATCT	786
	x3.7-bmp4-TTG	GATAAACCATGGGCTTGCCA	TTG	GTTTTAGAGCTAGAAATAGCAAGTTAAAATAAGGCTAGTCCGTTATCAACTTGAAAAAGTGGCACCGAGTCGGTGCTTTT	CTAATACGACTCACTATAGAAGATAAACCATGGGCTTGCCAGTTTTAGAGCTAGAAATAGCAAGTT	AAAAAAGCACCGACTCGGTGCCAC	ATTTGTTTAGTCATATGCAGTCGTCTC	CAGCCAAGGGAAATGGACAATCT	786
	x3.7-bmp4-TGC	GAAAGTTTTGATGTAAGCCC	TGC	GTTTTAGAGCTAGAAATAGCAAGTTAAAATAAGGCTAGTCCGTTATCAACTTGAAAAAGTGGCACCGAGTCGGTGCTTTT	CTAATACGACTCACTATAGAAGAAAGTTTTGATGTAAGCCCGTTTTAGAGCTAGAAATAGCAAGTT	AAAAAAGCACCGACTCGGTGCCAC	ATTTGTTTAGTCATATGCAGTCGTCTC	CAGCCAAGGGAAATGGACAATCT	786
	x3.7-bmp4-TAG	GCAAGTGGACACATGATAAG	TAG	GTTTTAGAGCTAGAAATAGCAAGTTAAAATAAGGCTAGTCCGTTATCAACTTGAAAAAGTGGCACCGAGTCGGTGCTTTT	CTAATACGACTCACTATAGAAGCAAGTGGACACATGATAAGGTTTTAGAGCTAGAAATAGCAAGTT	AAAAAAGCACCGACTCGGTGCCAC	ATTTGTTTAGTCATATGCAGTCGTCTC	CAGCCAAGGGAAATGGACAATCT	786
	x3.7-bmp4-AGC	GAGAATGAGGTGATTTCTTC	AGC	GTTTTAGAGCTAGAAATAGCAAGTTAAAATAAGGCTAGTCCGTTATCAACTTGAAAAAGTGGCACCGAGTCGGTGCTTTT	CTAATACGACTCACTATAGAAGAGAATGAGGTGATTTCTTCGTTTTAGAGCTAGAAATAGCAAGTT	AAAAAAGCACCGACTCGGTGCCAC	ATTTGTTTAGTCATATGCAGTCGTCTC	CAGCCAAGGGAAATGGACAATCT	786
	x3.7-bmp4-GCG	GACCAAAAGTTGAATAGGTC	GCG	GTTTTAGAGCTAGAAATAGCAAGTTAAAATAAGGCTAGTCCGTTATCAACTTGAAAAAGTGGCACCGAGTCGGTGCTTTT	CTAATACGACTCACTATAGAAGACCAAAAGTTGAATAGGTCGTTTTAGAGCTAGAAATAGCAAGTT	AAAAAAGCACCGACTCGGTGCCAC	AAGGTTTGTTCAATAGAGCCCTGTA	TTAAGAGACGACTGCATATGACTAAAC	369
	x3.7-bmp4-GGA	GAACTACACGATATCAGCAT	GGA	GTTTTAGAGCTAGAAATAGCAAGTTAAAATAAGGCTAGTCCGTTATCAACTTGAAAAAGTGGCACCGAGTCGGTGCTTTT	CTAATACGACTCACTATAGAAGAACTACACGATATCAGCATGTTTTAGAGCTAGAAATAGCAAGTT	AAAAAAGCACCGACTCGGTGCCAC	TAGCAACAGGATGGCGGTGACTAT	ATACCCTAGCGGTAGGTAGCTGGG	713
	x3.7-bmp4-ACG	GGAGGAGGAGGATGAACTAC	ACG	GTTTTAGAGCTAGAAATAGCAAGTTAAAATAAGGCTAGTCCGTTATCAACTTGAAAAAGTGGCACCGAGTCGGTGCTTTT	CTAATACGACTCACTATAGAAGGAGGAGGAGGATGAACTACGTTTTAGAGCTAGAAATAGCAAGTT	AAAAAAGCACCGACTCGGTGCCAC	TAGCAACAGGATGGCGGTGACTAT	ATACCCTAGCGGTAGGTAGCTGGG	713
	x3.7-bmp4-GGC	GTATATGCGGGACCTGTACA	GGC	GTTTTAGAGCTAGAAATAGCAAGTTAAAATAAGGCTAGTCCGTTATCAACTTGAAAAAGTGGCACCGAGTCGGTGCTTTT	CTAATACGACTCACTATAGAAGTATATGCGGGACCTGTACAGTTTTAGAGCTAGAAATAGCAAGTT	AAAAAAGCACCGACTCGGTGCCAC	TAGCAACAGGATGGCGGTGACTAT	ATACCCTAGCGGTAGGTAGCTGGG	713
	x3.7-bmp4-TGT	GCCCGCGTATATGCGGGACC	TGT	GTTTTAGAGCTAGAAATAGCAAGTTAAAATAAGGCTAGTCCGTTATCAACTTGAAAAAGTGGCACCGAGTCGGTGCTTTT	CTAATACGACTCACTATAGAAGCCCGCGTATATGCGGGACCGTTTTAGAGCTAGAAATAGCAAGTT	AAAAAAGCACCGACTCGGTGCCAC	TAGCAACAGGATGGCGGTGACTAT	ATACCCTAGCGGTAGGTAGCTGGG	713
	x3.7-bmp4-ATG	GCGGCCGCAGCCCAGTAAGG	ATG	GTTTTAGAGCTAGAAATAGCAAGTTAAAATAAGGCTAGTCCGTTATCAACTTGAAAAAGTGGCACCGAGTCGGTGCTTTT	CTAATACGACTCACTATAGAAGCGGCCGCAGCCCAGTAAGGGTTTTAGAGCTAGAAATAGCAAGTT	AAAAAAGCACCGACTCGGTGCCAC	TAGCAACAGGATGGCGGTGACTAT	ATACCCTAGCGGTAGGTAGCTGGG	713
	x3.7-bmp4-AAG	GCAAGCGGCCGCAGCCCAGT	AAG	GTTTTAGAGCTAGAAATAGCAAGTTAAAATAAGGCTAGTCCGTTATCAACTTGAAAAAGTGGCACCGAGTCGGTGCTTTT	CTAATACGACTCACTATAGAAGCAAGCGGCCGCAGCCCAGTGTTTTAGAGCTAGAAATAGCAAGTT	AAAAAAGCACCGACTCGGTGCCAC	TAGCAACAGGATGGCGGTGACTAT	ATACCCTAGCGGTAGGTAGCTGGG	713
	x3.7-bmp4-CGC	GCAGCGTCACCTCGAAATCC	CGC	GTTTTAGAGCTAGAAATAGCAAGTTAAAATAAGGCTAGTCCGTTATCAACTTGAAAAAGTGGCACCGAGTCGGTGCTTTT	CTAATACGACTCACTATAGAAGCAGCGTCACCTCGAAATCCGTTTTAGAGCTAGAAATAGCAAGTT	AAAAAAGCACCGACTCGGTGCCAC	TAGCAACAGGATGGCGGTGACTAT	ATACCCTAGCGGTAGGTAGCTGGG	713
	x3.7-bmp4-CGA	GGCAAGAAGAAAGTAGTGGC	CGA	GTTTTAGAGCTAGAAATAGCAAGTTAAAATAAGGCTAGTCCGTTATCAACTTGAAAAAGTGGCACCGAGTCGGTGCTTTT	CTAATACGACTCACTATAGAAGGCAAGAAGAAAGTAGTGGCGTTTTAGAGCTAGAAATAGCAAGTT	AAAAAAGCACCGACTCGGTGCCAC	TAGCAACAGGATGGCGGTGACTAT	ATACCCTAGCGGTAGGTAGCTGGG	713
	x3.7-bmp4-AGA	GATACCTGAGACGGGCAAGA	AGA	GTTTTAGAGCTAGAAATAGCAAGTTAAAATAAGGCTAGTCCGTTATCAACTTGAAAAAGTGGCACCGAGTCGGTGCTTTT	CTAATACGACTCACTATAGAAGATACCTGAGACGGGCAAGAGTTTTAGAGCTAGAAATAGCAAGTT	AAAAAAGCACCGACTCGGTGCCAC	TAGCAACAGGATGGCGGTGACTAT	ATACCCTAGCGGTAGGTAGCTGGG	713
	x3.7-bmp4-AGT	GGTATCAGGCTGGCATGGTT	AGT	GTTTTAGAGCTAGAAATAGCAAGTTAAAATAAGGCTAGTCCGTTATCAACTTGAAAAAGTGGCACCGAGTCGGTGCTTTT	CTAATACGACTCACTATAGAAGGTATCAGGCTGGCATGGTTGTTTTAGAGCTAGAAATAGCAAGTT	AAAAAAGCACCGACTCGGTGCCAC	TAGCAACAGGATGGCGGTGACTAT	ATACCCTAGCGGTAGGTAGCTGGG	713
	x3.7-bmp4-CAG	GATTTGAGTCTAATCCCCTA	CAG	GTTTTAGAGCTAGAAATAGCAAGTTAAAATAAGGCTAGTCCGTTATCAACTTGAAAAAGTGGCACCGAGTCGGTGCTTTT	CTAATACGACTCACTATAGAAGATTTGAGTCTAATCCCCTAGTTTTAGAGCTAGAAATAGCAAGTT	AAAAAAGCACCGACTCGGTGCCAC	TAGCAACAGGATGGCGGTGACTAT	ATACCCTAGCGGTAGGTAGCTGGG	713
	x3.7-bmp4-GAT	GGCATAGAAAAACAGTCCAT	GAT	GTTTTAGAGCTAGAAATAGCAAGTTAAAATAAGGCTAGTCCGTTATCAACTTGAAAAAGTGGCACCGAGTCGGTGCTTTT	CTAATACGACTCACTATAGAAGGCATAGAAAAACAGTCCATGTTTTAGAGCTAGAAATAGCAAGTT	AAAAAAGCACCGACTCGGTGCCAC	GATGGCAATTTCATTAACACGAGA	CATAGCCTCAGCAGTAAGTACCCAG	532
	x3.7-bmp4-GTG	GAAATTTGTGGAAAAGCTCA	GTG	GTTTTAGAGCTAGAAATAGCAAGTTAAAATAAGGCTAGTCCGTTATCAACTTGAAAAAGTGGCACCGAGTCGGTGCTTTT	CTAATACGACTCACTATAGAAGAAATTTGTGGAAAAGCTCAGTTTTAGAGCTAGAAATAGCAAGTT	AAAAAAGCACCGACTCGGTGCCAC	GATGGCAATTTCATTAACACGAGA	CATAGCCTCAGCAGTAAGTACCCAG	532
	x3.7-bmp4-CTG	GTATCATCTCCATCTGCAAA	CTG	GTTTTAGAGCTAGAAATAGCAAGTTAAAATAAGGCTAGTCCGTTATCAACTTGAAAAAGTGGCACCGAGTCGGTGCTTTT	CTAATACGACTCACTATAGAAGTATCATCTCCATCTGCAAAGTTTTAGAGCTAGAAATAGCAAGTT	AAAAAAGCACCGACTCGGTGCCAC	GATGGCAATTTCATTAACACGAGA	CATAGCCTCAGCAGTAAGTACCCAG	532
	x3.7-bmp4-GAA	GGTTCCTAAAATGAATATTG	GAA	GTTTTAGAGCTAGAAATAGCAAGTTAAAATAAGGCTAGTCCGTTATCAACTTGAAAAAGTGGCACCGAGTCGGTGCTTTT	CTAATACGACTCACTATAGAAGGTTCCTAAAATGAATATTGGTTTTAGAGCTAGAAATAGCAAGTT	AAAAAAGCACCGACTCGGTGCCAC	GATGGCAATTTCATTAACACGAGA	CATAGCCTCAGCAGTAAGTACCCAG	532
SpCas9	SpCas9-bace2	GATGAACATCTTGGTGGACA	CGG	GTTTTAGAGCTAGAAATAGCAAGTTAAAATAAGGCTAGTCCGTTATCAACTTGAAAAAGTGGCACCGAGTCGGTGCTTTT	CTAATACGACTCACTATAGAAGATGAACATCTTGGTGGACAGTTTTAGAGCTAGAAATAGCAAGTT	AAAAAAGCACCGACTCGGTGCCAC	CGGTCCCTCACTCCAACTAAACTAA	AAGTAGGTGTCCCCATACTCCTTGA	418

## Sheet: Table S5
Table S5. List of SaCas9 and KKH SaCas9 gRNA targeting sequences, PCR primers for the amplification of gRNA transcription templates, and PCR primers for detecting the targeted loci.
Nuclease	target name	target sequence (5'-3')	PAM (5'-3')	gRNA-F(T7 promoter+target+ partial gRNA backbone)(5'-3')	gRNA-R (5'-3')	detection primer F (5'-3')	detection primer R (5'-3')	detection fargment length (bp)
SaCas9	Sa-snf2h-T1	GATTACAGAGAAAAGCAAAAG	GTGAGT	CTAATACGACTCACTATAGGATTACAGAGAAAAGCAAAAGGTTTTAGTACTCTGGAAACAGAATC	AAAATCTCGCCAACAAGTTGAC	CACCAGATGTTAGCATTTTTGAGTT	GCAAGAAGCCAATTATAGAAGCCC	267
	Sa-snf2h-T2	TTAAAATCAAGAACAGCAATG	GTGAGT	CTAATACGACTCACTATAGTTAAAATCAAGAACAGCAATGGTTTTAGTACTCTGGAAACAGAATC	AAAATCTCGCCAACAAGTTGAC	TCATTTGCATGTTACACAAGCTAGG	CCAAATTTATTGTATTTCCTGAAGA	167
	Sa-ashl1-T1	ACAAACCCACACACAAACTGT	ACGAGT	CTAATACGACTCACTATAGACAAACCCACACACAAACTGTGTTTTAGTACTCTGGAAACAGAATC	AAAATCTCGCCAACAAGTTGAC	CCAAGTGGACCAAGGTTGTGAGT	ACATCTAAATGCGGCATGTCCTG	262
	Sa-best1-T1	GCATCTACAAACTGCTGTACA	GGGAGT	CTAATACGACTCACTATAGGCATCTACAAACTGCTGTACAGTTTTAGTACTCTGGAAACAGAATC	AAAATCTCGCCAACAAGTTGAC	TCGTGCCCATGACTGTGACGTA	GTACCTGTACGTGACACTGATGATG	164
	Sa-braf-T1	ATATAAGCTGGATCACTGGAG	AAGAGT	CTAATACGACTCACTATAGATATAAGCTGGATCACTGGAGGTTTTAGTACTCTGGAAACAGAATC	AAAATCTCGCCAACAAGTTGAC	TGTTGCACACAGGCTGTAACATCA	GATCTACAGGAATGATACACCCGTG	246
	Sa-gdf5-T1	CAGTGATAACATGTATTCATG	AGGAGT	CTAATACGACTCACTATAGCAGTGATAACATGTATTCATGGTTTTAGTACTCTGGAAACAGAATC	AAAATCTCGCCAACAAGTTGAC	CAAACTCATAAATATCCATGCAGAT	CCCTTGTCAATGAAGCTAGTGATAG	215
	Sa-mlh1-T1	ATGTGGAAATGGTTGAGGAAG	ATGAGT	CTAATACGACTCACTATAGATGTGGAAATGGTTGAGGAAGGTTTTAGTACTCTGGAAACAGAATC	AAAATCTCGCCAACAAGTTGAC	GGTTTGGTGGGAGCTTGTATCA	TGACATTACTTGTGCGTTAGTTACG	238
	Sa-mlh1-T2	ATTATAAATTTGACAAGTATA	CTGAGT	CTAATACGACTCACTATAGATTATAAATTTGACAAGTATAGTTTTAGTACTCTGGAAACAGAATC	AAAATCTCGCCAACAAGTTGAC	GGTTTGGTGGGAGCTTGTATCA	TGACATTACTTGTGCGTTAGTTACG	238
	Sa-musk-T1	GGTTGATGAAAATATCAGAGA	TGGAGT	CTAATACGACTCACTATAGGGTTGATGAAAATATCAGAGAGTTTTAGTACTCTGGAAACAGAATC	AAAATCTCGCCAACAAGTTGAC	AAGCCCTAGATAAGGTTCAATCTGG	GTTATCTGCCATGCAGGTAAACAGT	188
	Sa-hdac4-T1	TGTATAGAGGGAGCTGCGATA	CTGAGT	CTAATACGACTCACTATAGTGTATAGAGGGAGCTGCGATAGTTTTAGTACTCTGGAAACAGAATC	AAAATCTCGCCAACAAGTTGAC	TATACTGCCGTTTCTCTGTTTTATG	TTTGAGACAGGTGTACTTACATTGG	230
	Sa-tyr-T1	CCGCAGAGTCGCTCCTGAGCA	AGGAGT	CTAATACGACTCACTATAGCCGCAGAGTCGCTCCTGAGCAGTTTTAGTACTCTGGAAACAGAATC	AAAATCTCGCCAACAAGTTGAC	CCAGTCCTATAGATCAGGCTCGG	CATCCAGACAAAGAGGTCATACACG	591
	Sa-tyr-T2	ATGGTAAAATTCTCATCTCCT	GTGAGT	CTAATACGACTCACTATAGATGGTAAAATTCTCATCTCCTGTTTTAGTACTCTGGAAACAGAATC	AAAATCTCGCCAACAAGTTGAC	GGCCAAACTGCACAGAGAGAA	TGCAATGCAAAGGATTGGGACT	546
	Sa-tbx5-T1	TCCAGTGTGCGCCTGTGGCTG	GTGAGT	CTAATACGACTCACTATAGTCCAGTGTGCGCCTGTGGCTGGTTTTAGTACTCTGGAAACAGAATC	AAAATCTCGCCAACAAGTTGAC	TGACAAAATTAGCTCCACTTAGTGT	TGCTGTTATCATCTAATGTCACCAC	444
	Sa-tbx5-T2	ATGCATATCCTTCCCTGCCCC	ATGAGT	CTAATACGACTCACTATAGATGCATATCCTTCCCTGCCCCGTTTTAGTACTCTGGAAACAGAATC	AAAATCTCGCCAACAAGTTGAC	AGCCTAACAGAATGCAGAATACTTC	GCAAAGGAGTTCATACTTTTTGAGG	547
KKHsaCas9	KKH-Snf2h-T1	GAAACAAGAGCCGGGCGGAGA	CGCAGT	CTAATACGACTCACTATAGGAAACAAGAGCCGGGCGGAGAGTTTTAGTACTCTGGAAACAGAATC	AAAATCTCGCCAACAAGTTGAC	GTTGGACGGACGGTGTTAGTAGATC	CCATAAAGTGCGTGCTGCCTG	218
	KKH-Snf2h-T2	GAGAAACTCTCAAACATGGGT	GAAAGT	CTAATACGACTCACTATAGGAGAAACTCTCAAACATGGGTGTTTTAGTACTCTGGAAACAGAATC	AAAATCTCGCCAACAAGTTGAC	CACCAGATGTTAGCATTTTTGAGTT	GCAAGAAGCCAATTATAGAAGCCC	267
	KKH-Ashl1-T1	GCGAGGCTGGAGACAGAACCT	TGCAGT	CTAATACGACTCACTATAGGCGAGGCTGGAGACAGAACCTGTTTTAGTACTCTGGAAACAGAATC	AAAATCTCGCCAACAAGTTGAC	GCTCGTCAAGACAATTATCCGTAAG	TCCTATGTAAATGGTTCCTTTCTTG	208
	KKH-Ashl1-T2	GTAGGAGGGAGGGGGCAGCGG	GGTAGT	CTAATACGACTCACTATAGGTAGGAGGGAGGGGGCAGCGGGTTTTAGTACTCTGGAAACAGAATC	AAAATCTCGCCAACAAGTTGAC	CCTTATTCTCCCTCGCCTCTCAC	CTTCTTATGGTACTTGGCAGGGTTG	177
	KKH-best1-T1	ATGACACAGGAATCAGCTCTG	CATAGT	CTAATACGACTCACTATAGATGACACAGGAATCAGCTCTGGTTTTAGTACTCTGGAAACAGAATC	AAAATCTCGCCAACAAGTTGAC	AATTCAGACTGCTCTGCTACAACAG	ATGAGTGCTGATGACTCCTGAGGT	221
	KKH-braf-T1	TCCGCTGCCAGACGTGCGGGT	ACAAGT	CTAATACGACTCACTATAGTCCGCTGCCAGACGTGCGGGTGTTTTAGTACTCTGGAAACAGAATC	AAAATCTCGCCAACAAGTTGAC	TGCCACTCAGCCCTGTTCCTT	GGCACTTACTCTAGACGGTCGTAGT	193
	KKH-braf-T2	AAATGAAGTAGGAGTCCTCAG	GTAAGT	CTAATACGACTCACTATAGAAATGAAGTAGGAGTCCTCAGGTTTTAGTACTCTGGAAACAGAATC	AAAATCTCGCCAACAAGTTGAC	TCGTCTCATTCGCTGATTATCTCCC	ATCTCTTTGCAAGGGGTGCCAA	234
	KKH-hdac4-T1	ATGATACATTGATGTTAAAAC	ACCAGT	CTAATACGACTCACTATAGATGATACATTGATGTTAAAACGTTTTAGTACTCTGGAAACAGAATC	AAAATCTCGCCAACAAGTTGAC	TCACCACAGGTACAGTTTTTGTGAT	TTGCTCACCTCACACATGCTACG	241
	KKH-musk-T1	AGCAAGATGCCATCTGATAGG	CCAAGT	CTAATACGACTCACTATAGAGCAAGATGCCATCTGATAGGGTTTTAGTACTCTGGAAACAGAATC	AAAATCTCGCCAACAAGTTGAC	CATGAAGAAGTTATTTACTATGTTA	ATTTTTTGAGAAGGATTATCCCACA	227
	KKH-nfyb-T1	ATAGCTCTACAACAGATACGT	CTCAGT	CTAATACGACTCACTATAGATAGCTCTACAACAGATACGTGTTTTAGTACTCTGGAAACAGAATC	AAAATCTCGCCAACAAGTTGAC	TGGAACCAAGTTAGTAATCAGTACC	AGACTTACCATCATGGGGCTGTAT	217
	KKH-tyr-T1	TGACCAGCTCTGCTACTGGCC	CTCAGT	CTAATACGACTCACTATAGTGACCAGCTCTGCTACTGGCCGTTTTAGTACTCTGGAAACAGAATC	AAAATCTCGCCAACAAGTTGAC	CCAGTCCTATAGATCAGGCTCGG	CATCCAGACAAAGAGGTCATACACG	591
	KKH-tyr-T2	AGAAAGGAGATATTCCGAATG	AGCAGT	CTAATACGACTCACTATAGAGAAAGGAGATATTCCGAATGGTTTTAGTACTCTGGAAACAGAATC	AAAATCTCGCCAACAAGTTGAC	CCAGTCCTATAGATCAGGCTCGG	CATCCAGACAAAGAGGTCATACACG	591
	KKH-tbx5-T1	CTGGGTAAATGCAGCCTGAGG	AGAAGT	CTAATACGACTCACTATAGCTGGGTAAATGCAGCCTGAGGGTTTTAGTACTCTGGAAACAGAATC	AAAATCTCGCCAACAAGTTGAC	GCGTGTAAAGAAACTGACAGACATT	TTCCTTGCATATGGTACAGTGGTAA	507
	KKH-tbx5-T2	AGAACTGTGGCTGAAATTTCA	CGAAGT	CTAATACGACTCACTATAGAGAACTGTGGCTGAAATTTCAGTTTTAGTACTCTGGAAACAGAATC	AAAATCTCGCCAACAAGTTGAC	TTTTGAAACTCGATAAATTCACCCA	GGTGCGTTTTATTGTAACCTGACAT	474

## Sheet: Table S6
Table S6. List of LbCas12a crRNA targeting sequences, T7 primer and single-stranded oligodeoxynucleotides used for the generation of crRNA transcription templates, and PCR primers for detecting the targeted loci.
Nuclease	target name	target sequence (5'-3')	PAM(5'-3')	crRNA-S (T7 promoter)(5'-3')	crRNA-A (T7 promoter+crRNA stem loop+target)(5'-3')	detection primer F (5'-3')	detection primer R (5'-3')	detection fargment length (bp)
LbCas12a	Lb-tyr-T1	CAGGGGCCAGTTCCCAAGGGCAT	TTTG	CTAATACGACTCACTATAGAA	ACCGACAGCGGCCATCAGCCCAAATCTACACTTAGTAGAAATTCTATAGTGAGTCGTATTAG	CCAGTCCTATAGATCAGGCTCGG	CATCCAGACAAAGAGGTCATACACG	591
	Lb-tyr-T2	CATTCACTGGGGTTGACGATAGA	TTTC	CTAATACGACTCACTATAGAA	CTTGCAGACAGGTATAGTTACTAATCTACACTTAGTAGAAATTCTATAGTGAGTCGTATTAG	CCAGTCCTATAGATCAGGCTCGG	CATCCAGACAAAGAGGTCATACACG	591
	Lb-tyr-T3	CAACAGGACGTGCCAATGCCTTG	TTTA	CTAATACGACTCACTATAGAA	GATACCCCTGTGGAACCAGAGCCATCTACACTTAGTAGAAATTCTATAGTGAGTCGTATTAG	CCAGTCCTATAGATCAGGCTCGG	CATCCAGACAAAGAGGTCATACACG	591
	Lb-tyr-T4	CAGTCTGCACAGTTATAGCCCAT	TTTG	CTAATACGACTCACTATAGAA	CTGCTGAGGGTGGGGGGCAATAGATCTACACTTAGTAGAAATTCTATAGTGAGTCGTATTAG	CCAGTCCTATAGATCAGGCTCGG	CATCCAGACAAAGAGGTCATACACG	591
	Lb-sftpb	CTATTGCCCCCCACCCTCAGCAG	TTTC	CTAATACGACTCACTATAGAA	CAAGGCATTGGCACGTCCTGTTGATCTACACTTAGTAGAAATTCTATAGTGAGTCGTATTAG	ATGGGGGCTCAGTACAAGGATTAC	GAAGAGCAACGGCACATATGGTAG	604
	Lb-tbx5	GGCTCTGGTTCCACAGGGGTATC	TTTG	CTAATACGACTCACTATAGAA	ATGGGCTATAACTGTGCAGACTGATCTACACTTAGTAGAAATTCTATAGTGAGTCGTATTAG	ATGAAAAGCCAGAGAAAGTTGATGA	GGAATTACCTCTCTTACCTGCTGGG	589
	Lb-ctcf	TAGTAACTATACCTGTCTGCAAG	TTTA	CTAATACGACTCACTATAGAA	TCTATCGTCAACCCCAGTGAATGATCTACACTTAGTAGAAATTCTATAGTGAGTCGTATTAG	TCTTATTTCACAGCCTAACTGGGTA	TTCATTCTGTCAAACTCTTTTCGTT	535
	Lb-ptf1a/p48	TTGGGCTGATGGCCGCTGTCGGT	TTTC	CTAATACGACTCACTATAGAA	ATGCCCTTGGGAACTGGCCCCTGATCTACACTTAGTAGAAATTCTATAGTGAGTCGTATTAG	GGATGCAGTCCATCAATGACGC	GAACTGCAAACGAATTATCTATGGA	468
